1 ***Diverse stepping motions of cytoplasmic dynein revealed by***  
2 ***kinetic modeling***

3 Shintaroh Kubo<sup>1</sup> Tomohiro Shima<sup>2</sup>, and Shoji Takada<sup>1\*</sup>

4

5 1) Department of Biophysics, Graduate School of Science, Kyoto University, Kyoto 6068502,  
6 Japan

7 2) Department of Biological Sciences, Graduate School of Science, The University of Tokyo,  
8 Tokyo 113-0033.

9

10 \*Corresponding author

11 [takada@biophys.kyoto-u.ac.jp](mailto:takada@biophys.kyoto-u.ac.jp) (ST)

12

13 Short title

14 Diverse dynein stepping motions revealed by kinetic modeling

15

## 16 **Abstract**

17 Cytoplasmic dynein is a two-headed molecular motor that moves to the minus end of  
18 microtubule (MT) using ATP hydrolysis free energy. By employing its two heads (motor  
19 domains), cytoplasmic dynein shows various bipedal stepping motions; the inchworm and hand-  
20 over-hand motions, as well as non-alternate steps of one head. However, the molecular basis to  
21 achieve such diverse stepping manners remains obscure. Here, we propose a kinetic model for  
22 bipedal motions of cytoplasmic dynein and performed Gillespie Monte Carlo simulations that  
23 reproduces most experimental data obtained to date. The model represents status of each motor  
24 domain as five states according to conformations, nucleotide- and MT-binding conditions of the  
25 domain. Also, the relative positions of the two domains were approximated by three discrete  
26 states. Accompanied by ATP hydrolysis cycles, the model dynein stochastically and  
27 processively moved forward in multiple steps via diverse pathways, including inchworm and  
28 hand-over-hand motions, same as experimental data. The model reproduced key experimental  
29 motility-related parameters including velocity and run-length as functions of ATP concentration  
30 and external force. Our model reveals that, in a typical inchworm motion, the leading domain  
31 moves via the ATP-dependent power-stroke of the linker coupled with a small change in the  
32 stalk angle, whereas the lagging domain moves via diffusion dragged by the leading domain.  
33 Moreover, the hand-over-hand motion in the model dynein clearly differs from that of kinesin  
34 by the usage of the power-stroke.

## 35 **Author Summary**

36 Cytoplasmic dynein is a two-headed molecular motor, which moves linearly and transports  
37 intra-cellular organelles along microtubules driven by ATP hydrolysis free energy. In contrast to  
38 other better-known molecular motors, such as kinesin, dynein is known to take various stepping  
39 motions including motions akin to human walking and inchworm-like motions. However,  
40 molecular mechanisms underpinning the diverse stepping motions are unclear. Here, based on  
41 recent high-resolution structure information and single-molecule motility assay data, we  
42 designed a kinetic model that explicitly include two heads, each of which makes ATP  
43 hydrolysis cycles and moves along the microtubules. Using the model, we performed Monte  
44 Carlo simulations. The simulation reproduced most of currently available experimental results.  
45 More importantly, the simulation suggested molecular mechanisms of various stepping motions.  
46 While stepping motions apparently resemble to those proposed before, once looking into details,  
47 we found the resulting mechanisms distinct from previously proposed ones in the usage of ATP  
48 and protein conformation changes coupled with stepping motions.

49

## 50 Introduction

51 Cytoplasmic dynein (hereafter, denoted as dynein for simplicity) is a molecular motor that show  
52 bipedal motions on the microtubules (MT) to its minus end, driven by ATP hydrolysis free  
53 energy[1–3]. This motility enables dynein to play essential roles in various cellular functions  
54 including intracellular transport, positioning of organelles and cell division. As such, dynein is  
55 often compared with another MT-based molecular motor, kinesin, most of which walks to the  
56 plus end of MT[4]. Single-molecular measurements clarified that the kinesin-1 walks rather  
57 regularly via the so-called hand-over-hand manner; two motor domains alternately move from  
58 the lagging position to the leading position, akin to human walking. This motion of kinesin  
59 leads to precise 8 nm steps per one ATP hydrolysis reaction[5]. The hand-over-hand mechanism  
60 is also in harmony with the experiment that a mutant kinesin that impairs one motor domain  
61 severely slows down kinesin motility [6,7]. In contrast, dynein moves more stochastically with  
62 various step size, which ranges 4-32 nm with its representative size of 8 nm [8–11]. In addition  
63 to the hand-over-hand motions, dynein can take the so-called inchworm-like motions; walking  
64 via alternating steps with one motor domain being always ahead of the other domain, as well as  
65 non-alternating steps[10–13].

66 Previous structural studies delineate the ATP-dependent conformational changes in each  
67 dynein motor domain. The dynein motor domain consists of the ATPase associated with diverse  
68 cellular activities (AAA+) ring[14,15], the microtubule binding domain (MTBD), the stalk, the  
69 linker, and the tail domain (see cartoons in Fig 1A). The AAA+ ring (a large donut shape in Fig  
70 1A) made of six subdomains, AAA1-AAA6, possesses the ATPase activity and energizes the  
71 dynein movement[16]. The MTBD (small circles near the MT in Fig 1A) is a small domain  
72 responsible for the binding to MT. The stalk is a long coiled-coil that connects the AAA+ ring  
73 and the MTBD[16,17]. The linker (an arrowhead-like object drawn on the AAA+ ring) is  
74 associated with the AAA+ ring and connects to the tail domain where two motor domains  
75 dimerize (the tail domain not drawn in Fig 1A)[18,19]. Biochemical and structural experiments  
76 have revealed that ATP hydrolysis reactions in AAA1 play the primary role in the movement,  
77 affecting conformations of the entire motor domain[15,20]. In particular, depending on the  
78 nucleotide state in AAA1, both the linker and the MTBD make marked structural changes  
79 which are of central importance in the motility[17]. When AAA1 is in the ATP-bound state, the  
80 linker is largely bent on the AAA+ ring and the tip of the linker is located near AAA2/AAA3  
81 subdomains (the bottom-left cartoon in Fig 1B), whereas, in the ADP bound and apo state of  
82 AAA1, the linker tends to be more extended on the AAA+ ring reaching to the AAA4/AAA5  
83 subdomains (the top-right cartoon in Fig 1B)[21–24]. The linker is expected to swing

84simultaneously or immediately after Pi release and swings back upon ATP binding, which are  
85termed the power-stroke and recovery-stroke, respectively. The power-stroke of the linker is  
86considered to be responsible for dynein force generation [17,25,26]. The MTBD tends to take a  
87low affinity state to MT in the ATP bound state, while it takes a high affinity conformation to  
88MT in the ADP-bound and apo states [20]. This ATP-dependent change in the affinity of  
89MTBD must be critical, because dynein needs to bind tightly with MT when it exerts force  
90against MT but needs to dissociate from MT during recovery-stroke to avoid backward  
91movement[27,28]. In addition to these specific parts of the motor domain, allosteric  
92conformational changes in the entire motor domain may play an important role for the dynein  
93movement[29,30].

94

95**Fig 1. The kinetic model of the two-headed dynein.** (A) Architecture of the dynein motor  
96domain structure. (B) The five state model of one dynein motor domain and transitions among  
97states. (C) The motor domain position. The position is defined by the tip of the linker where  
98cargos and/or beads are attached. In the model, it takes discrete positions with 8 nm spacing. (D)  
99The dimeric dynein state. The first (designated red) motor domain is either 8 nm ahead of, at the  
100same position as, or 8 nm behind the second (blue) motor domain, which are represented,  
101respectively, as +, 0, or -. As a whole, there exist  $5 \times 5 \times 3 = 75$  states for the bipedal dynein.  
102We label each state, e.g., 2TDM+ where the first integer is the state number from 1 to 75,  
103followed by the states of the red and then blue motor domains. The rightmost symbol represents  
104the positioning of the red domain relative to the blue. (E) Effects of external force to the  
105backward direction on transition rates. (F) Effects of internal force/tension on transition rates.

106

107 However, these ATP-dependent conformational changes in each motor domain alone do not  
108explain how diverse walking manners are realized. In order to clarify the mechanism of various  
109walking manners, we need to characterize coordination of the two motor domain movements  
110coupled with ATPase cycle. Observing the coordinated motion directly by single-molecule  
111experiments is, however, currently difficult due to the time- and the spatial-resolution.

112 Therefore, several theoretical models have been proposed to understand the walking  
113mechanisms of dynein. Most theoretical models proposed before the X-ray structure reports are  
114unavoidably simple and consider only one motor domain [31,32]. A more elaborate kinetic  
115model that explicitly deals with coordination of the two motor domains clarified a class of  
116necessary coordination and the force-dependent motility change well [33]. The model is,  
117however, limited to the hand-over-hand coordination and is not compatible with recent  
118experimental data. More recently, a mechano-chemical model that connects the two ATP-

119dependent motor domains via elastic bonds elucidated correlation between the motion and the  
120tension [34]. Yet, in the model, chemical cycles in the two domains are treated as independent.  
121However, in order to clarify the mechanism of versatile walking mechanisms, it is crucial to  
122model how ATP hydrolysis reactions and conformational change proceed, correlated with the  
123relative configuration of the two motor domains.

124 In this study, we propose a new kinetic model of dynein that explicitly contains chemical  
125and conformational states of each motor domain, directly coupled with the relative positions of  
126the two domains along MT. The kinetic model can explain molecular basis of versatile walking  
127manners. We represent chemical and conformational states of each dynein motor domain as 5  
128discrete states. For the relative positions of the two domains, for simplicity, we assume it taking  
1293 discrete states: either one is 8 nm ahead of, at the same position as, or 8 nm behind the other  
130motor domain along MT. Together our kinetic model consists of  $5 \times 5 \times 3 = 75$  states and  
131considers transitions among these states, which is solved by Monte Carlo (MC) simulations with  
132the Gillespie algorithm[35]. We reproduced experimentally observed behaviors with various  
133dynein walking manner and uncovered detailed and comprehensive pathways.

134

## 135 **Model and Methods**

### 136 **Five state model for a dynein motor domain.**

137Our model assumes that each dynein motor domain takes one of five possible states depending  
138on the combination of the nucleotide bound in AAA1, the binding to MT, conformation of the  
139linker, and that of MTBD (Fig 1B). The five states are the followings:

- 140(1) The DM state: ADP is bound in AAA1. The linker is in the post-power-stroke (extended)  
141 state. The high-affinity MTBD binds to MT.
- 142(2) The T state: ATP is bound in AAA1. The linker is in the post-power-stroke state. The low-  
143 affinity MTBD is unbound from MT.
- 144(3) The T\* state: ATP is bound in AAA1. The linker is in the pre-power-stroke (bent) state. The  
145 low-affinity MTBD is unbound from MT. The stalk leans towards the MT long axis.
- 146(4) The D\*M state: ADP is bound in AAA1. The linker is in the pre-power-stroke state. The  
147 high-affinity MTBD binds to MT. The stalk leans towards the MT long axis.
- 148(5) The D state: ADP is bound in AAA1. The linker is in the post-power-stroke state. The high-  
149 affinity MTBD is, however, unbound from MT.

150Of the five states, the states (1) and (3) correspond to X-ray crystal structures solved to date  
151(PDB ID: 3VKH and 4RH7, respectively)[22,36] (note that those are for different families) and  
152thus are assumed to be relatively stable, whereas the other three states are considered as

153 transient states with higher free energies. We note that, when the linker takes the pre-power-  
 154 stroke state (the D\*M and T\* states), we assume that the stalk leans to the MT long axis with a  
 155 smaller angle between the stalk and the MT compared with the other states. This is based on  
 156 experimental data that suggests the motor domain to stand up with the MTBD position fixed  
 157 upon power stroke motion[37]. This suggestion was further supported by some electron-  
 158 microscopic observations for cytoplasmic dynein [38,39] as well as for axonemal dynein [17].

159 Next, we setup transitions among the five states of motor domain.

160 (1) DM → T: ADP release is followed by ATP binding and a dissociation of the motor domain  
 161 from MT

162 (2) T → T\*: The recovery-stroke of the linker

163 (3) T\* → D\*M: ATP hydrolysis is followed by the Pi release and the binding of the motor  
 164 domain to MT

165 (4) D\*M → DM: The power-stroke of the linker

166 The above four transitions form the main (and thus productive) ATP hydrolysis cycle.

167 Additionally, we include the following off-pathways.

168 (5) D\*M → D & DM → D: The dissociation of the motor domain from MT

169 (6) D → T: ADP release is followed by ATP binding, without the binding to MT

170 (7) T\* → D: ATP hydrolysis is followed by Pi release, without the binding to MT.

171 Our model assumes that the ATP hydrolysis cycle of one ATP molecule corresponds to one  
 172 power-stroke and recovery stroke, without considering ATP hydrolysis in other AAAs than  
 173 AAA1 subdomain.

174 Since the dynein motor domain never synthesizes ATP from ADP and Pi in any condition, we  
 175 do not consider the reverse transitions of (3) or (7), D\*M → T\* or D → T\*. For all the other  
 176 transitions, we take into consideration of the reverse transitions. We note that all the cyclic  
 177 transition paths that do not include the ATP hydrolysis, i.e. T\* → D\*M and T\* → D, should give  
 178 no net free energy changes. This leads us to the following equalities to be satisfied.

$$179 k_{D^*M \leftarrow D} \cdot k_{DM \leftarrow D^*M} \cdot k_{D \leftarrow DM} = k_{D \leftarrow D^*M} \cdot k_{D^*M \leftarrow DM} \cdot k_{DM \leftarrow D} \quad (1)$$

$$180 k_{D^*M \leftarrow D} \cdot k_{DM \leftarrow D^*M} \cdot k_{T \leftarrow DM} \cdot k_{D \leftarrow T} = k_{D \leftarrow D^*M} \cdot k_{D^*M \leftarrow DM} \cdot k_{DM \leftarrow T} \cdot k_{T \leftarrow D} \quad (2)$$

$$181 k_{DM \leftarrow D} \cdot k_{T \leftarrow DM} \cdot k_{D \leftarrow T} = k_{D \leftarrow DM} \cdot k_{DM \leftarrow T} \cdot k_{T \leftarrow D} \quad (3)$$

182

### 183 Movement of dynein motor domain along MT

184 We next define the position of the dynein motor domain. Since cargos *in vivo* and beads in  
 185 single-molecule experiments are connected to the tip of the linker, we define the position of

186motor domain by the position of the tip of the linker. In addition, we approximate that the tip of  
187the linker resides in discrete positions spaced with 8 nm (Fig 1C).

188 Next, we discuss the movement of the motor domain. We assume that the position of the  
189linker tip changes via the power-stroke/recovery-stroke, and the diffusive motion. First, in the  
190power-stroke transition  $D^*M \rightarrow DM$  (see Fig 1B), the tip of the linker position moves 8 nm to  
191the forward direction (the minus end of MT), whereas in the reverse reaction of the power-  
192stroke (note that this is not the recovery stroke), the tip moves 8 nm to the backward direction  
193(the plus end of MT) although the reverse reaction rarely happens.

194 Both the yeast and human dynein molecules can move forward against 5~10 pN backward  
195loading [9,40]. If the load force disturbs the linker motion completely, the dynein molecules  
196would not step forward. Therefore, as a common feature of dynein, the power-stroke motion of  
197the linker should be able to undergo against more than 5~10 pN of the load. This led us to  
198model the following energy difference between pre- and post- power stroke states;

$$199 \frac{k_{DM \leftarrow D^*M}}{k_{D^*M \leftarrow DM}} = \exp\left(\frac{10 \text{ pN} \times 8 \text{ nm}}{k_B T}\right)$$

200where  $T$  is the temperature, the Boltzmann constant  $k_B$  takes  $k_B=0.0138 \text{ pN} \cdot \text{nm}/\text{K}$ . We note  
201that the tip of the linker does not move during the recovery-stroke from the T to T\* states  
202because the MTBD is unbound from MT.

203 Next, we consider the diffusive motion. In our five states model, only in the D, T and T\*  
204states among five states of our model, the motor domain can move diffusively along MT. We  
205assume that the motor domain takes an 8-nm step to forward or backward direction during the  
206diffusive movement. We define the rates for the forward and backward diffusive transitions as  
207 $\lambda_{for}$  and  $\lambda_{back}$ , respectively. The values of  $\lambda_{for}$  and  $\lambda_{back}$  are set as the same for all the three  
208states; the D state, the T state, and the T\* state. In addition, by symmetry,  $\lambda_{for}$  and  $\lambda_{back}$  must be  
209the same values when the external force is not applied.

210

### 211 **The dimeric dynein motor domains**

212We assume that dynein moves as a homo-dimer of the motor domain throughout this study. To  
213distinguish two identical motor domains, throughout the paper, we call the first one as "red  
214domain" and the second domain as "blue domain", merely for convenience, corresponding to the  
215colors used in figures (Fig 1D for example). For the minimal complexity of the model, we set  
216that the difference in the positions of the two motor domains along MT being either +8 nm, 0  
217nm, or -8 nm (Fig 1D for the case of +8 nm). Thus, the relative positions of the two dynein  
218motors can be regarded as the three-state model. When the red motor domain is ahead of, at the



219 same position as, and behind the blue motor domain, we write their configurations as +, 0, and -,  
220 respectively (The minus end of MT is regarded as the forward direction). Assumed here is that  
221 the two motor domains use different protofilaments so that they can have 0 nm distance along  
222 axial direction of MT. We do not include the side-steps from one to another proto-filaments. We  
223 also note that the generalization of this restraint of the inter-motor-domain distance to the  
224 multiples of 8 nm is straightforward.

225 Combining 5 states for each motor domain and 3 states for the relative positions between the  
226 two motor domains, the current model for the dimeric dynein has  $5 \times 5 \times 3 = 75$  states in total.  
227 To indicate each of 75 states clearly, we introduce a combinatorial notation, which we explain  
228 with an example, 2TDM+. In this notation, the first integer (2 in the example) represents the  
229 numbering of the state from 1 to 75 (S1 Table). The following characters represent states of the  
230 first (red one in Fig 1D) and the second (blue one in Fig 1D) motor domains; in this example the  
231 red motor domain is in the T state, while the blue one is in the DM state. The last symbol, either  
232 +, 0, or -, represents the relative position of the two motor domains along MT.

233

### 234 Effect of external forces

235 Our model incorporates the effect of external force. We suppose the external force is applied to  
236 the tip of the linker through the attached bead or cargo in the direction parallel to MT. In this  
237 work, we limit ourselves to the case where the external force is applied to the plus end  
238 (backward direction to the functional movements) of MT. When one motor domains is ahead of  
239 another domain, i.e. the state with + or -, it is natural to assume that the external force is applied  
240 only to the motor domain that locates in the opposite side to the direction of the external force.  
241 Thus, the external force  $F$  is applied to the leading motor domain located closer to the minus  
242 end. When the two motor domains take the same position along the MT, we assume each motor  
243 domain is subjected to a half of the external force  $F/2$ .

244 Since the power-stroke changes the bead position, transition rates for the power-stroke and its  
245 reverse process must be affected by the external force. We can easily incorporate this effect into  
246 the energy difference between pre- and post- power-stroke states as,

$$247 \frac{k_{DM \leftarrow D^i M}}{k_{D^i M \leftarrow DM}} = \exp\left(\frac{(10 - F) pN \times 8 nm}{k_B T}\right) \quad (4)$$

248 Of note, the external force  $F$  takes the positive value when dynein is pulled to the plus end  
249 direction of MT. Based on this equation, we rescaled the rate of the reverse of the power-stroke  
250 process, making it more probable to occur as the force is applied, whereas the rate of the power-  
251 stroke is unchanged.



252 Similarly, the diffusive motions are affected by the external force. It is natural to assume the  
253 ratios between  $\lambda_{for}$  and  $\lambda_{back}$  depends on the external force as

$$254 \frac{\lambda_{for}}{\lambda_{back}} = \exp\left(\frac{-F pN \times 8 nm}{k_B T}\right) \exp(-1.9 F pN) \quad (5)$$

255 We have multiple choices of  $\lambda_{for}$  and  $\lambda_{back}$  that satisfy this equation. Here, we put the force de-  
256 pendence in  $\lambda_{back}$  making the backward diffusion more probable to occur as the force is ap-  
257 plied, while the rate of the forward step is unchanged. Besides, previous experiments uncovered  
258 that the dissociation rates of the motor domain from the MT increases with the external force  
259 [41,42]. Since this could be an essential feature of the dynein motor domain, we include this ef-  
260 fect into our model. Specifically, all the transitions from MT-bound states to unbound states,  
261 such as  $D^*M \rightarrow D$  and  $DM \rightarrow D$ , that occur in the leading motor domain are accelerated by a  
262 force-dependent factor. Note that this corresponds to the increase in the free energy of the lead-  
263 ing domain MT-bound state by the logarithm of the force-dependent factor. We introduce a  
264 multiplying factor  $f_{ext}(F)$  into the dissociation rates of the motor domain under the force  $F$ . An  
265 example is illustrated in Fig 1E. We set  $f_{ext}(F) = \exp(B \cdot F)$  because the associated energy  
266 changes should be proportional to the external force. Here,  $B$  is a fitting parameter that we esti-  
267 mate below. When the motor domain that is subjected to a half of the external force dissociates  
268 from MT, the factor becomes  $f_{ext}(F/2) = \sqrt{f_{ext}(F)}$  (see an example in Fig 1E from the third to  
269 the fourth states).

270

### 271 **Internal force between two motor domains**

272 Since the two motor domains are connected, each motor domain should receive internal force  
273 from the other one when the both motor domains are bound on MT. We treat the internal force  
274 being independent of the external force. Previous experimental study shows the asymmetric  
275 dissociation rates of MTBD from MT for the case of internal force [41,42]. Therefore, the  
276 lagging motor domain should dissociate with larger rates than that of the leading (minus-end  
277 side) motor domain due to the opposite directions of internal force for the leading and lagging  
278 motor domains when both motor domains are bound to MT with 8-nm gap,. We incorporate this  
279 effect by introducing a multiplying factor  $f_{\tilde{i}\tilde{i}}$  into the dissociation rate of the lagging motor  
280 domain when the leading domain is also bound on the MT (Fig 1F).

281 To satisfy the condition that the free energy change along any cyclic path must be zero, we  
282 put the same factor  $f_{\tilde{i}\tilde{i}}$ , either in the numerator or in the denominator, of many surrounding

283 transition rates, as in S1 Fig. We begin with the acceleration of the transitions by  $f_{\dot{\epsilon}}$ ;  
 284  $4D^*MDM^+ \rightarrow 24D^*MD^+$  and  $1DM^+MDM^+ \rightarrow 21DM^+MD^+$  (see Fig 1F), in which the lagging  
 285 motor domains are peeled out due to the inter-motor domain force. These changes are  
 286 accommodated by increasing the free energies of  $4D^*MDM^+$  and  $1DM^+MDM^+$  by  $\ln \dot{\epsilon}$ , which  
 287 can be viewed as the internal tension. These free energy changes in the two states result in  
 288 including the same multiplying factor, either in the numerator or in the denominator of all the  
 289 rate constants connected with these two states (Fig 1F for an example and S1 Fig for the  
 290 complete picture). For example, in S1 Fig,  $4D^*MDM^+$  can transit to  $5DDM^+$  and  $9D^*MT^+$  so  
 291 that we introduce  $f_{\dot{\epsilon}}$  into the incoming rates from these two states.

292

### 293 Setting up the rate constants

294 Now, we discuss the values of rate constants. As of now, due to the lack of experimental mea-  
 295 surements, we cannot decide many parameters without uncertainty. Yet, we would like to  
 296 choose a set of parameters that satisfy the physics law, equations (1)-(4), and that are consistent  
 297 with all the available data as much as possible.

298 First, from single-molecule experiments for the monomeric dynein, we can set

$$299 k_{T \leftarrow T} = 200 \text{ s}^{-1}, k_{D^i M \leftarrow T^i} = 200 \text{ s}^{-1}, k_{D \leftarrow T^i} = 5 \text{ s}^{-1} [43].$$

300 Second, the transition  $DM \rightarrow T$  contains the ADP release ( $k_{ADP-\dot{\epsilon}}: 10 \text{ s}^{-1} \dot{\epsilon}$ ), ATP binding ( $k_{ATP+\dot{\epsilon}}: 2 \mu M \cdot \text{s}^{-1} \dot{\epsilon}$ ), and the dissociation from MT ( $k_{off}: 500 \text{ s}^{-1}$ ), as a roughly sequential process  
 301 [43]. So we can express  $k_{T \leftarrow DM}$  as

$$302 k_{T \leftarrow DM} = \frac{20 \cdot [ATP]}{2 \cdot [ATP] + 10}$$

304 In the derivation process, we assumed that the dissociation from MT is much faster than the  
 305 other processes. Thus,  $k_{T \leftarrow D}$  becomes the same as  $k_{T \leftarrow DM}$ .

306 Third, since direct experimental data are not available at the moment for other values,  
 307 we infer physically feasible values guided by the detailed balance conditions and other re-  
 308 straints. We assume the power-stroke motion is fast enough and set it as

309  $k_{DM \leftarrow D^i M} = 1000 \text{ s}^{-1}$ . Of note, as far as this is large enough, the result does not depend on  
 310 this precise value at all. Using the physical constraint, eq.(4), we also can obtain

$$311 k_{D^i M \leftarrow DM} = 1000 \exp\left(\frac{-(10-F) \text{ pN} \times 8 \text{ nm}}{k_B T}\right)$$

312 Next, we suppose that the high affinity MTBD does not dissociate from MT without the applied  
 313 external or internal force. We thus choose  $k_{D \leftarrow DM}$  as a sufficiently small value; specifically, it  
 314 must be much smaller than  $k_{T \leftarrow DM} \cdot 10 \text{ s}^{-1}$  at its saturated value. Since both  $k_{D \leftarrow DM}$  and  
 315  $k_{D \leftarrow D^*M}$  represent dissociation of the high affinity MTBD from MT, we set  $k_{D \leftarrow DM} = k_{D \leftarrow D^*M}$ .  
 316 The D state must be inherently unstable. Thus, the lifetime of the D state is short and it changes  
 317 quickly to the DM state. It is natural to assume  $k_{DM \leftarrow D} > k_{T \leftarrow DM} \cdot 10 \text{ s}^{-1}$ . From the detailed  
 318 balance condition, we get

$$319 k_{D^*M \leftarrow D} = k_{DM \leftarrow D} \exp\left(\frac{-(10-F) \text{ pN} \times 8 \text{ nm}}{k_B T}\right)$$

320 Others rate constant values are determined to satisfy the detailed balance. Finally,  $k_{T \leftarrow T^* \ddot{i} \ddot{i}}$   
 321 should be smaller than the reverse process,  $k_{T^* \leftarrow T}$ .

322 We list all the kinetic parameters used in the current simulations in Table 1.

323

324 **Table 1 Rate constant values for motor domain**

| Rate constant                               | values ( $\text{s}^{-1}$ )                                                   |
|---------------------------------------------|------------------------------------------------------------------------------|
| $k_{T^* \leftarrow T}$                      | 200                                                                          |
| $k_{D^*M \leftarrow T^* \ddot{i} \ddot{i}}$ | 200                                                                          |
| $k_{DM \leftarrow D^*M}$                    | 1000                                                                         |
| $k_{T \leftarrow DM}$                       | $\frac{20 \cdot [ATP]}{2 \cdot [ATP] + 10}$                                  |
| $k_{T \leftarrow T^* \ddot{i} \ddot{i}}$    | 10                                                                           |
| $k_{DM \leftarrow T}$                       | 1/10                                                                         |
| $k_{D^*M \leftarrow DM}$                    | $1000 \exp\left(\frac{-(10-F) \text{ pN} \times 8 \text{ nm}}{k_B T}\right)$ |
| $k_{D \leftarrow D^*M}$                     | 1/100                                                                        |
| $k_{D^*M \leftarrow D}$                     | $100 \exp\left(\frac{-(10-F) \text{ pN} \times 8 \text{ nm}}{k_B T}\right)$  |
| $k_{D \leftarrow DM}$                       | 1/100                                                                        |
| $k_{DM \leftarrow D}$                       | 100                                                                          |
| $k_{D \leftarrow T}$                        | 1/100000                                                                     |
| $k_{T \leftarrow D}$                        | $\frac{20 \cdot [ATP]}{2 \cdot [ATP] + 10}$                                  |
| $k_{D \leftarrow T^* \ddot{i} \ddot{i}}$    | 5                                                                            |
| $\lambda$                                   | 200                                                                          |

325 The unit of [ATP] is  $\mu\text{M}$ .

326

327 Next, we determine the external force dependent factors. The detachment force of dynein,  
 328 i.e., a critical force beyond which dynein detaches from MT promptly, to the plus end of MT  
 329 with the high affinity MTBD is estimated to be approximately 2 pN (Shima et al, manuscript in  
 330 preparation). This suggests that, with the external force of 2 pN, the DM state should change to  
 331 the D state, rather than the other states, i.e., the T state. Thus, we require

332  $k_{T \rightarrow DM} \ll f_{ext}(F) \cdot k_{D \rightarrow DM} (\dot{\omega} k_{D \rightarrow D^*M})$ . We note that  $k_{T \rightarrow DM} = 10 \text{ s}^{-1}$  at the saturated ATP con-  
 333 centration. Since we set the dissociation rates with no external force to be

334  $k_{D \rightarrow D^*M} = k_{D \rightarrow DM} = \frac{1}{100} \text{ s}^{-1}$ , previously, we decided to choose  $f_{ext}(2 \text{ pN}) = 10000$ . To this

335 end, we obtain  $f_{ext}(F) = 100^{(F \text{ pN})} \exp(4.61 F \text{ pN})$ . Note that the estimate of the detachment  
 336 force contains some uncertainty; if the detachment force were equal to 3 pN, we would have

337  $f_{ext}(F) \exp(3.07 F \text{ pN})$

338 While there is no experimental estimate for the value of  $f_{\dot{\omega}}$ , merely for the consistency with  
 339 the effect of the external force in the previous section, we set  $f_{\dot{\omega}=10000}$ ; we suppose the dissoci-  
 340 ate rate of the relevant motor domain from MT may be equal. We also tested how this value  
 341 would alter the results, finding that most of the qualitative results are not changed, except the  
 342 probabilities to choose individual paths (see Discussions).

343

### 344 Monte Carlo simulations

345 As the basic dynamic equations for the kinetic model of  $5 \times 5 \times 3 = 75$  states, we take the master  
 346 equation;

347  $\frac{d p_i(t)}{dt} = \sum_{j=1}^{75} T_{i \leftarrow j} p_j(t)$  where  $p_j(t)$  is the time-dependent probability to be in the j-th state and

348 the transition matrix  $T_{i \leftarrow j}$  represents corresponding transition rates for the non-diagonal  
 349 elements and cumulative outgoing rates for the diagonal elements, respectively. Of the  $75 \times 75$   
 350 matrix elements, we have already described all the non-zero elements, while the other elements  
 351 are zero. In this work, we solved this master equation via Gillespie Monte Carlo (MC)  
 352 simulations, a random number-based sampling of the solution. When the system resides in j-th  
 353 state at a time t, the Gillespie algorithm first chooses the state to go; among those connected  
 354 from the current state j, a state i is chosen by the probability proportional to the corresponding  
 355 transition rate  $T_{i \leftarrow j}$ . Next, using the summation of all the rates connected from the state j,

356  $k_j = \sum_i T_{i-j}$ , the transition time  $\Delta t$  is drawn randomly from the waiting time distribution in  
357 Poisson process,  $P(\Delta t) = k_j \exp(-k_j \Delta t)$ . In all the MC trajectories, we begin with the initial  
358 state, 1DMDM+, the red motor domain in the DM state is ahead of the blue motor domain,  
359 which is also in the DM state. Each MC simulation is terminated at the moment when both  
360 motor domains are disassociated from MT (i.e., T, T\*, or D state) or when the time exceeds 10s.  
361 For each setup, we repeated MC simulation 10000 times with different random number  
362 sequences.

363 We also note that the current master equation can be solved by the standard linear algebra,  
364 as well. We tried to solve the linear algebraic equation by an algebraic manipulation software.  
365 However, we did not succeed to obtain the closed formula for this large matrix. Still, one can  
366 solve the linear equation numerically, obtaining the exact numerical values for velocity and the  
367 run length. However, the MC simulation is more straightforward to analyze pathways, and thus  
368 we took the MC approach in this study.

369

### 370 **Analysis of the run length from trajectory**

371 When we determine the run-length from a trajectory, to avoid possible artefacts in the initial  
372 configuration, we used a scheme used in experiments[38]. First, we plotted the cumulative  
373 probability distribution  $c(x)$  (red crosses in Fig 2B) as a function of the run length  $x$ , and  
374 confirmed that  $1 - c(x)$  exhibits exponential decay for  $x > 1$ step. This is probably due to the  
375 Poisson process of the dynein detachment. Given the exponential behavior, we fitted  $c(x)$  with  
376 the form,

$$377 c(x) = 1 - \exp\left(-\frac{x_0 - x}{x_{mean}}\right)$$

378 to obtain  $x_0$  and the mean run length  $x_{mean}$  by the nonlinear least square estimation with the  
379 Marquardt-Levenberg algorithm. Here,  $x_0$  is used to accommodate irregular behavior of the  
380 very initial stage.

381

382 **Fig 2. Bipedal motions of dimeric dynein via Monte Carlo simulations.** (A) Five  
383 representative trajectories at  $[ATP] = 1\text{mM}$  with no external force. The red and blue curves,  
384 respectively, represent positions of red and blue motor domains along MT in one trajectory.  
385 Grey curves represent movements of two motor domains in four other trajectories. The inset is a  
386 close up between 0.6s and 0.8s. (B) The cumulative probability distribution (red crosses)  
387 calculated from the final arrival distance for 10000 MC trajectories under the same condition as

388(A) and its fitted curve (green). (C) Median velocity and mean run length as a function of [ATP]  
389with no external force. Error bars from each point of  $x_{mean}$  are asymptotic standard errors. (D)  
390Mean velocity as a function of the external force for a few different [ATP]. (E) Median number  
391of steps per consumed ATP (ATP efficiency) for a few different [ATP] and external forces. The  
392error bar represents quartile range. (F) Histograms of the hand-over-hand and inchworm  
393motions.

394

395

## 396 **Results**

### 397 **Kinetic model reproduces many data on the wild-type dynein motility**

398 First, we examine the basic motility of our kinetic model comparing the simulation results with  
399 experimental data. We performed MC simulations of wild type dimeric dynein movement with  
400 [ATP] = 1 mM and no external force. We repeated simulations 10,000 times, from which five  
401 representative trajectories are shown in Fig 2A (see S2 Fig for the entire trajectories). For this  
402 trajectory, we see that dynein stochastically proceeded to the minus-end direction of MT for ~20  
403 steps before detachment from MT at ~2.2s. Interestingly, we find dynein sometime moved quite  
404 rapidly, but also exhibited occasional pauses. During the pauses, we find some rapid stamping  
405 of one motor domain (while one domain pauses in a position, the other domain moves back and  
406 forth many times, as in the inset of Fig 2A). The other four trajectories (drawn in grey curves in  
407 the figure) proceeded to the same direction and roughly with the same velocity.

408 From the 10,000 trajectories, we estimated the mean run length; for example, for the case of  
409 [ATP] = 1 mM, it was estimated as  $3.6 \pm 0.15$  step (Fig 2B). We plot the mean run length as a  
410 function of the ATP concentration [ATP] (Fig 2C). The mean run length shows a peak at around  
411 [ATP] =  $1 \mu\text{M}$  and levels off at higher [ATP]. The ATP-bound dynein, the T or T\* states, has  
412 weak affinity to MT and thus the saturated [ATP] diminish the run length. The characteristic  
413 event that the run-length becomes longer with lower [ATP] was also reported in 22S dynein of  
414 *Tetrahymena* cilia and cytoplasmic dynein of mammalian [44,45].

415 We then plot the velocity as a function of the ATP concentration [ATP] (Fig 2C). For the  
416 velocity, we defined it as the ratio of the distance of movement to the time duration between  
417 long-time pauses, from which we obtained the median  $v_{med}$  of the velocity distribution as the  
418 representative value. We note there can be several other ways to define the velocity, which we  
419 discuss in the supporting information (S3 Fig). As [ATP] increases, the velocity increases at the  
420 low [ATP] and then saturates at higher [ATP], which is qualitatively consistent with  
421 experiments. In the saturated [ATP], each motor domain is bound by ATP for most of time and

422the ATP binding does not determine the velocity, as usual. The maximum velocity in the model  
423dynein was about 6 step/s  $\sim$  50 nm/s.

424 Experimentally, the velocity of dynein movement has been measured and known to depend  
425on the species/constructs. The velocities for the full length and the GST dimer of *Dictyostelium*  
426dynein are  $\sim$ 200 nm/s [46], and  $\sim$ 500 nm/s [47], respectively. For mammalian dynein, the DDB  
427complex proceeds with 500 $\sim$ 800 nm/s and the GST dimer velocity is  $\sim$ 500 nm/s [48]. For yeast,  
428the full length dynein moves at the velocity  $\sim$ 80 nm/s [8] and the GST dimer proceeds with  
429 $\sim$ 100 nm/s [49]. Our model dynein moved with the velocity similar to that of yeast dynein  
430Reasons that the model shows lower velocity than *Dictyostelium* dynein may be attributed to the  
431choice of the low rate constant for  $k_{T \rightarrow DM}$  which actually could dramatically change depending  
432on the dimeric state [43].

433 Next, we calculated dynein motions under the external force to the backward direction, i.e.,  
434towards the plus-end of MT. The estimated velocity  $v_{med}$  is plotted against the strength of the  
435external force for a few different [ATP] in Fig 2D. With non-zero [ATP], the velocity is positive  
436at low external force and becomes negative at sufficiently large force, as expected. Notably, the  
437mean velocity crosses zero at the same external force ( $\sim$ 2 pN), regardless of [ATP]. This is in  
438harmony with a recent experimental result in dynein motility assays (Shima et al, manuscript in  
439preparation). Another non-trivial behavior is a slight increase in the velocity with a weak  
440external force of 0 - 1 pN, which we will discuss later.

441

442 We also estimated the efficiency of our model dynein. Specifically, we plotted in Fig 2E the  
443median forward step numbers per one ATP hydrolysis, termed ATP efficiency for brevity, for  
444several combinations of [ATP] and the external force. Focusing on the ATP efficiency in the  
445absence of external force, although the run length and the velocity differ by far between [ATP]=  
4461  $\mu$ M and [ATP]= $10^3$   $\mu$ M, the ATP efficiency changes less than 5%. Namely, the average move  
447per one ATP cycle does not depend on the ATP concentration much, whereas the waiting time  
448for ATP binding depends on [ATP] and thus affects the velocity at low-to-medium range of  
449[ATP]. As [ATP] increases, the ATP efficiency decreases slightly from 0.71 at 1  $\mu$ M, to 0.68 at  
450 $10^3$   $\mu$ M. This is because the forward move by the power-stroke is partly canceled by the  
451influence of diffusion in the weakly coupled dissociation state. When we applied the external  
452force to the backward direction, we found the increase in the ATP efficiency for the range  
453[ATP] = 1 –  $10^3$   $\mu$ M and up to the force of 1pN (the efficiency reaches to  $\sim$ 1). Above 1.5 pN,  
454the efficiency decreased. This is related to the increase in the velocity with a weak external  
455force mentioned above, and we will come back to this feature in the pathway analysis later.



456 Notably, with large external forces (1.5 pN and above for  $[ATP] = 1 \mu M$ , and 2.0 pN for the  
457 other  $[ATP]$ ), we found a much larger variance in the ATP efficiency than the cases of weaker  
458 force. With large opposing force, dynein occasionally goes backwards largely and then detaches  
459 from MT, which makes sampling of broad data difficult.

460

### 461 **Mutants that impair one motor domain activity**

462 It is an interesting feature of dimeric dynein that it can proceed to the same direction even  
463 when one of motor domains lacks the ATP binding or hydrolyzing ability [11,50]. Here, to test  
464 our model, we performed MC simulations for the two cases that mimic the two types of  
465 impaired heterodimeric mutants. Fig 3A shows representative trajectories for the case where one  
466 motor domain does not bind ATP. Clearly, with the ATP-binding deficient mutant in one motor  
467 domain, it still moved to the forward direction with qualitatively similar processivity. Not  
468 surprisingly, during the processive movement, the intact motor domain was ahead of the mutant  
469 motor domain in most steps. We also see this mutant showed slightly reduced velocity and  
470 slightly increased run length, compared to the wildtype (grey in the figure) (Fig 3C and 3D).  
471 This is because the mutation leads to increase the population in the high-affinity state to MT,  
472 which slowed the movement and increased the processivity. Both of these effects have been  
473 shown in previous experiments, suggesting our model calculation qualitatively agreed with the  
474 experiments [50].

475

476 **Fig 3. Motility of two mutants of dynein.** (A) Representative trajectories at  $[ATP] = 1 mM$   
477 with no external force for a mutant of which right (blue) motor domain does not bind ATP. The  
478 positions of the deficient motor domain are drawn in black. Grey trajectories are for wild-type.  
479 The inset is a close up between 3s and 3.5s. (B) Representative trajectories at  $[ATP] = 1 mM$   
480 with no external force for a mutant of which right (blue) motor domain does not hydrolyze ATP.  
481 The positions of right motor domain are drawn in black. Grey trajectories are for wild-type. The  
482 inset is a close-up view from 0s to 0.14s. (C) Histogram of the run length. Red, green, and blue  
483 curves represent the wild-type, the case where one motor domain does not bind ATP, and the  
484 case where one motor domain does not hydrolyze ATP, respectively. (D) Mean velocities and  
485 their standard deviations for the three cases as in (C).

486

487

488 Fig 3B plots trajectories for the case where one of motor domain does not hydrolyze ATP.  
489 The ATP-hydrolysis deficient mutant moved forward, but markedly reduced the processivity

490and run length because the mutated motor domain stay in T or T\* states with low affinity to  
491MT. We also see this mutant showed slightly reduced velocity, compared to the wild-type case  
492(grey in the figure) (Fig 3C and 3D). Indeed, previous experiments showed decreases in the run-  
493length and the velocity for this mutant [50]. Thus, our model calculation qualitatively agrees  
494with the experiment.

495 We note, however, that experiments showed the ATP-hydrolysis deficient mutant moves  
496with larger velocity than the ATP-binding deficient mutant, which differs from our model  
497calculations. We consider that our model dynein of the ATP-hydrolysis deficient mutant  
498detaches from MT quickly so that it is difficult to complete ATP cycles in many trajectories,  
499which makes the velocity estimate difficult.

500

### 501**The bipedal mechanism: Pathway analysis**

502So far, we described overall behavior of motility in our kinetic model, showing that the model  
503can reproduce many of previous experimental observations. Now, we analyze the underlying  
504mechanisms emerged from our model. For this purpose, we focus on the case of  $[ATP] = 1 \text{ mM}$   
505with no external force, unless otherwise denoted.

506 Fig 4 shows the whole network of the states-to-state transition dynamics, which, albeit of high  
507complexity, contains full of mechanistic information. Hereafter, we decipher this complex  
508network. Of the 75 states, the network contains only those that appeared in our 10000  
509trajectories.

510

511**Fig 4: The whole network of pathways.** Black filled and open circles represent the dimeric  
512dynein states bound on and detached from MT (the dead-end), respectively. Red (blue) arrows  
513indicate the transitions where the state in the red (blue) monomer changes, whereas the green  
514arrows mean the diffusive motions along MT. Integers written on the arrows represent the  
515number of transition times observed in simulations, with which the thickness of the arrow  
516correlates. For the meaning of the label of each state, see the text. 1DMDM+, 26DMDM 0, and  
51751DMDM - are marked with stars, to emphasize their high populations.

518

519

520 Of the 75 states, the most populated states were the 26DMDM0 state (see S2 Table for the list  
521of high population states); both monomers are in the DM states located at the same position  
522along MT (implicitly, bound on different proto-filaments) (a star mark located near the center of  
523the figure).

524 Starting from this ground state 26DMDM0 and following probable transitions (thick arrows,  
525 with the counts larger than 5000), we find a pair of probable cyclic pathways. The one that  
526 makes a clockwise rotation in the upper side of the figure is

527 Path 1: 26DMDM0 → 31DMT0 → 36DMT\*0 → 41DMD\*M0 → 51DMDM- → 55DDM-  
528 → 30DDM0 → 26DMDM0

529 On this pathway, from the 26DMDM0 state to the 51DMDM- state via three transient states, the  
530 blue motor domain completed one ATP hydrolysis cycle while the red one remained in the DM  
531 state, by which the blue motor domain proceeded by one step forward via recovery-stroke and  
532 the subsequent power-stroke of the linker (Remember that, to distinguish two identical motor  
533 domains, we call the first and the second domains as the red and the blue domains,  
534 respectively). The 51DMDM- state is a long-lived intermediate state (star-marked in the figure).  
535 Subsequently, the lagging red motor domain detached from MT reaching to 55DDM-, which is  
536 followed by the diffusive motion of the red motor domain 30DDM0. Finally, the red domain  
537 rebound to the MT returning into the starting state 26DMDM0. When the dimeric dynein  
538 repeats this cycle more than once, this process is normally called the inchworm motion.

539 Notably, during this cycle, the ATP hydrolysis reaction occurred only in the leading (blue)  
540 motor domain, whereas the lagging (red) motor domain is simply dragged by the leading one.  
541 This is in harmony with the observation that the mutants that impair motor activity still move in  
542 one direction. The other prominent cycle (a clockwise cycle in the bottom side of the figure),  
543 which is related to the first one by symmetry, is,

544 Path 1': 26DMDM0 → 27TDM0 → 28T\*DM0 → 29D\*MMDM0 → 1DMDM+ →  
545 21DMD+ → 46DMD0 → 26DMDM0

546 in which the red motor domain hydrolyzes one ATP to drive the system forward. Clearly, the  
547 mechanism is identical to the first cycle.

548 Thus, while the pathway analysis exhibit extremely diverse routes, we find a dominant cyclic  
549 pathway which corresponds to the inchworm motion.

550

### 551 **Distinct bipedal motions**

552 While we found one prominent cyclic pathway, Path 1, in the previous section, due to the com-  
553 plexity of the whole network in Fig 4, we need a more systematic analysis to reveal various  
554 pathways. Given that each motor domain has the highest population in the DM state (S2 Table),  
555 we systematically seek pathways that connect the dimeric dynein states where both motor do-  
556 mains take the DM states. Among several possible combinations, we found the two cases are  
557 dominant; 1) the one starting from and ending to the 26DMDM0 state and 2) the other starting

558 from 1DMDM+ and ending at 51DMDM- without passing through the 26DMDM0 state. We  
559 note that, by symmetry, we also observed the case from 51DMDM- to 1DMDM+, of which the  
560 mechanisms are identical to the second case.

561 We depict the schematic pictures of the major cyclic paths starting from and ending at the  
562 26DMDM0 state in Fig 5A. Clearly, all these correspond to the inchworm motions when the cy-  
563 cles are repeated more than once. In the 10000 trajectories, we identified 15896 steps of inch-  
564 worm motions. The figure contains, in the second row, the Path 1 already described above based  
565 on the visual inspection.

566 Path 1: 26DMDM0  $\rightarrow$  31DMT0  $\rightarrow$  36DMT\*0  $\rightarrow$  41DMD\*M0  $\rightarrow$  51DMDM-  $\rightarrow$  55DDM-  
567  $\rightarrow$  30DDM0  $\rightarrow$  26DMDM0

568

569 **Fig 5:** The two distinct bipedal working pathways. (A) The inchworm-like pathway. (B) The  
570 hand-over-hand pathway. Schematic diagrams and the whole network are drawn on the left and  
571 the right, respectively.

572

573 As described above, the leading motor domain made one ATP hydrolysis cycle driving this do-  
574 main forward by one step, whereas the lagging motor domain moved via diffusive motions  
575 dragged by the leading domain. In addition, we find a branch path depicted in the top row of the  
576 figure, in which the detached leading motor domain diffused backward, which is followed by  
577 the recovery-stroke and subsequently the power-stroke. Overall, the molecule returned to its  
578 original state and position. Moreover, we find another branch path depicted in the bottom line  
579 of the figure, where the detached blue motor domain diffused forward. The following steps in-  
580 clude recovery-stroke and then the power-stroke in the blue motor domain. Together, the dynein  
581 moved 2 steps forward, one by diffusion and the other by the power stroke. Thus, while a pair of  
582 linker recovery-stroke and the subsequent power-stroke in the leading domain contributes to the  
583 one forward step, additional diffusive motions, if any, can modulate the motions.

584 Next, we consider the paths starting from 1DMDM+ and ending at 51DMDM- without pass-  
585 ing through the 26DMDM0 state, of which a schematic picture is drawn in Fig 5B. Albeit high  
586 diversity, these paths all correspond to the hand-over-hand motions. In the 10000 trajectories,  
587 we identified 3328 steps of the hand-over-hand motions, which is about one fifth of the inch-  
588 worm motions (Fig 2F). This route contains many branches, but each path includes one or more  
589 relatively slow transition processes, making this entire route not as frequently used as the Path  
590 1.

591 Among the many branches during the hand-over-hand motion, the most frequently used path  
592 was as follows,

593 Path 2:  $1\text{DMDM}^+ \rightarrow 6\text{DMT}^+ \rightarrow 11\text{DMT}^{*+} \rightarrow 36\text{DMT}^{*0} \rightarrow 41\text{DMD}^{*}\text{M}0 \rightarrow 51\text{DMDM}-$   
594 During the process, fueled by the ATP hydrolysis reaction cycle in the blue motor domain, the  
595 blue domain moved from the rear side of the red motor domain to the forward side by 2 steps,  
596 and thus 16 nm. We note that one of the 2 steps is via diffusive movement. More in details,  
597 starting from the  $1\text{DMDM}^+$  state, the internal tension from the forward red motor domain in-  
598 duces the ADP dissociation/ ATP binding in the rear blue domain, leading to the detachment  
599 from the MT ( $6\text{DMT}^+$ ) and subsequently recovery stroke ( $36\text{DMT}^{*+}$ ). Then, the lagging blue  
600 domain diffuses forward ( $36\text{DMT}^{*0}$ ), which is followed by the ATP hydrolysis ( $41\text{DMD}^{*}\text{M}0$ ).  
601 Finally, the power-stroke in the blue domain moved the blue domain one more forward step. We  
602 note that in this process the one (blue) motor domain moved by two steps, one via diffusion and  
603 the other by the power-stroke. The other (red) motor domain remained in the DM state through-  
604 out. Interestingly, the hand-over-hand motion in the model dynein is qualitatively different from  
605 that of kinesin-1 (or conventional kinesin), the neck-linker docking (classically termed the  
606 power-stroke) occurs in the MT-bound leading head. Whereas, our model dynein uses the  
607 power-stroke of the lagging motor domain to move itself forward. When the dimeric dynein  
608 continues on this bipedal motion, the next step is that the red motor domain moves forward by  
609 two steps using ATP hydrolysis reaction. Therefore, mutants that impair one motor domain ac-  
610 tivity cannot move by this mechanism. There exist similar paths closely related to the Path 2,  
611 such as

612 Path 2':  $1\text{DMDM}^+ \rightarrow 6\text{DMT}^+ \rightarrow 31\text{DMT}0 \rightarrow 36\text{DMT}^{*0} \rightarrow 41\text{DMD}^{*}\text{M}0 \rightarrow 51\text{DMDM}-$   
613 which differs from the Path 2 only in the third state  $31\text{DMT}0$ . These are essentially the same.

614 Occasionally, we observed that both the blue and red motor domains made diffusional move-  
615 ment during one ATP cycle in the blue domain. The path can be described as

616 Path 3:  $1\text{DMDM}^+ \rightarrow 6\text{DMT}^+ \rightarrow 31\text{DMT}0 \rightarrow 56\text{DMT}^- \rightarrow 61\text{DMT}^{*-} \rightarrow 66\text{DMD}^{*}\text{M}- \rightarrow$   
617  $70\text{DD}^{*}\text{M}- \rightarrow 45\text{DD}^{*}\text{M}0 \rightarrow 55\text{DDM}- \rightarrow 51\text{DMDM}-$

618 This whole path contains three diffusive movements, in addition to one ATP hydrolysis cycle in  
619 the blue motor domain.

620 In summary, starting from the states where both motor domains are in the most stable DM  
621 states, we found two prominent cyclic pathways, Paths 1 and 2, which correspond to the inch-  
622 worm and the hand-over-hand motions, respectively. By counting the respective cycles in the  
623 trajectories, we found that the inchworm motions are more probable than the hand-over-hand

624 motions for all the [ATP] and the external force conditions tested here (Fig 2F). The predomi-  
625 nance of the inchworm steps in the model dynein is in harmony with the experiment data [10].  
626

### 627 **Fast-track, slow-track, and back-step**

628 So far we described the inchworm and the hand-over-hand motions in the model dynein step-  
629 ping, but the whole network includes many more sub-dominant pathways. To address effects of  
630 dynein stepping pathway in its velocity, we classified fragments of trajectories by the short-term  
631 velocity defined within the fragment. Here, we define the three classes, fast-track, slow-track,  
632 and backward move and discuss dominant pathways in each class (we exclude the medium-ve-  
633 locity class because it corresponds to the dominant pathways discussed above). The fast-track is  
634 defined as the fragment of trajectories that have their velocities faster than the third quartile  
635 value (480 nm/s). Similarly, the slow-track is defined as those with the velocities slower than  
636 the first quartile value and that are positive (54 nm/s). The backward move is defined as the  
637 negative velocities in the fragment of trajectories.

638 First, Fig 6A depicts the fast-track pathways and its schematic mechanism. One prominent  
639 path starts from the 1DMDM+ state (or equivalently 51DMDM- state) and proceed via the Path  
640 (the hand-over-hand manner).

641 Path 2: 1DMDM+  $\rightarrow$  6DMT+  $\rightarrow$  11DMT\*+  $\rightarrow$  36DMT\*0  $\rightarrow$  41DMD\*M0  $\rightarrow$  51DMDM-  
642

643 **Fig 6.** Dominant motions in different velocity regimes. (A) Fast-track motion. (B) Slow-track  
644 motion. (C) Backward motion. Schematic diagrams and the whole network are drawn on the left  
645 and the right, respectively.

646

647 As above, in the fast-track pathways, there exist some small variant paths. For example, when  
648 the order of the recovery stroke and the diffusion is exchanged from the above path, we obtain a  
649 variant path depicted at the top line in the left side of Fig 6A. Alternatively, starting from the  
650 initial 1DMDM+ state, detachment and the diffusion of the rear domain can precede the nucleo-  
651 tide exchange reaction, which is drawn at the bottom line of the left side of Fig 6A. In summary,  
652 the hand-over-hand motion dominates the fast movement.

653 Next, we discuss the slow-track, of which schematic pathways are drawn in Fig 6B. The  
654 prominent pathway observed is

655 Path 4: 26DMDM0  $\rightarrow$  31DMT0  $\rightarrow$  36DMT\*0  $\rightarrow$  11DMT\*+  $\rightarrow$  16DMD\*M+  $\rightarrow$   
656 26DMDM0

657 The first three states in this path are identical to that in the Path 1. From the 36DMT\*0 state, the  
658 blue motor domain diffused backward (11DMT\*+). Then, the blue domain was bound on the  
659 MT upon ATP hydrolysis (16DMD\*M+), which is followed by the power-stroke to return the  
660 26DMDM0 state. This path was illustrated in Fig 2A at around the time 0.70 - 0.74 s where we  
661 see long pause with an instantaneous back step of the blue domain. Overall, the molecule did  
662 not proceed forward, but came back to its original location. A variant of the Path 4 is also de-  
663 picted at the bottom line of the left side of Fig. 6B. Pathways observed in the low velocity class  
664 always include a backward diffusion.

665 Finally, we describe the case in which the dimeric dynein moved backward. Fig 6C merged  
666 with Fig 6B represent a pathway,

667 Path 5: 51DMDM- → 56DMT- → 6DMT+ → 11DMT\*+ → 16DMD\*M+ →  
668 26DMDM0

669 The last three states in this path are identical to those in Path 4. A crucial feature in this pathway  
670 is that, in the very first transition, the leading blue domain detached from MT, which is in con-  
671 trast to the detachment of the lagging domain in the Path 2; the hand-over-hand motion. Once  
672 the leading blue domain is detached, it cannot diffuse forward, but can diffuse backward, due to  
673 the restraint from the MT-bound red motor domain. In the Path 5, the blue domain diffused  
674 backward by two steps, which is followed by the recovery stroke and then the power-stroke mo-  
675 tion in the blue domain. Overall, the dimeric dynein moved backward by one step.

676

## 677 Discussion

### 678 The observed primary inchworm motion uses one ATP per a dimer step

679 Here, we propose the kinetic model, which can reproduce extremely versatile modes of dynein  
680 movement. Our model suggests that the dominant pathway is the inchworm motion, which is  
681 about 5 times as many as the hand-over-hand motions. This is consistent with a recent report  
682 that classifies the modes of movements of dynein finding that about 80% of steps are of the  
683 inchworm type motions [10].

684 Notably, among some variants, the most prominent inchworm pathway in our model dynein,  
685 Path 1: 26DMDM0 → 31DMT0 → 36DMT\*0 → 41DMD\*M0 → 51DMDM- → 55DDM-  
686 → 30DDM0 → 26DMDM0

687 uses only one ATP hydrolysis per a dimer step. Namely, only the leading motor domain moves  
688 via ATP-dependent linker power-stroke coupled with a change in the stalk angle, whereas the  
689 lagging motor domain is moved via diffusion dragged by the leading motor domain without the  
690 ATP hydrolysis cycle. In this sense, the observed model is clearly different from previously



691 suggested inchworm models where two ATP hydrolysis are assumed to occur per a dimer step  
692 (e.g., Fig. 4 in [51], Fig. 2 in [2]). It should be noted that the current model do include such a  
693 pathway. In Fig. 3, we find the transition from 51DMDM- to 52TDM-, which continues to make  
694 the following cycle,

695 Classic inchworm path: 26DMDM0  $\rightarrow$  31DMT0  $\rightarrow$  36DMT\*0  $\rightarrow$  41DMD\*M0  $\rightarrow$

696 51DMDM-  $\rightarrow$  52TDM-  $\rightarrow$  53T\*DM-  $\rightarrow$  54DM\*DM-  $\rightarrow$  26DMDM0

697 where each motor domain hydrolyzes one ATP, resulting in two ATP consumption per a dimer  
698 step. In our model, this pathway is minor since the transition from 51DMDM- to 52TDM- oc-  
699 curs with a relatively low probability. A recent single-molecule assay measured the AAA+ ring  
700 angles relative to MT, finding that about 50% of motor domain steps are coupled with small an-  
701 gle changes in the AAA+ ring [52]. The Path 1 is perfectly in harmony with this result because  
702 only the leading motor domain takes the ATP hydrolysis cycle which exerts the force and leads  
703 to changes in the AAA+ ring angle. On the other hand, the classic inchworm path is not compat-  
704 ible with this single-molecule assay data because it contains twice of ATP hydrolysis cycles and  
705 steps and thus it takes 100% coupling between the stepping and the angle change.

706 Within our model, we assume that the stalk lean towards the MT axis by about 15 degree in  
707 the pre-power-stroke state, T\* and D\*M states, relative to the post-power-stroke state. However,  
708 the lifetimes of the pre-power-stroke states are rather short: From the populations in every states  
709 (S2 Table), we estimated the probability to have at least one pre-power-stroke state is only 15%,  
710 as a whole. Thus, due to short lifetimes of the pre-power-stroke states, some of these angle  
711 changes in the stalk might not been observed by the single-molecule assay [53].

712 It is interesting to discuss an analogy to other molecular motors that are known to use the  
713 inchworm motions: Some helicases and ATP-dependent chromatin remodelers are known to use  
714 the inchworm motions to proceed along DNA [54–56]. The inchworm motions in these mole-  
715 cules are realized by two subdomains where the ATP hydrolysis is catalyzed at the interface of  
716 the two subdomains. In the apo-state, the subdomains are bound on DNA in an open form. Upon  
717 ATP binding, subdomains close by sliding one of the two subdomains on DNA by one base-  
718 pair. After ATP hydrolysis, the subdomains return to the open form by moving the other subdo-  
719 main on DNA by one base-pair, which results in the one base-pair inchworm motion. Notably,  
720 one ATP hydrolysis cycle is sufficient to achieve one inchworm motion in these cases. Thus, this  
721 usage of ATP is similar to the inchworm motions found in the current simulations for the model  
722 dynein.

723

724 **The observed hand-over-hand motion agrees with the previous models**

725 We observed the hand-over-hand motions as a sub-dominant pathway. Even though there exist  
726 many branch paths, a prominent one is

727 Path 2: 1DMDM+  $\rightarrow$  6DMT+  $\rightarrow$  11DMT\*+  $\rightarrow$  36DMT\*0  $\rightarrow$  41DMD\*M0  $\rightarrow$  51DMDM-  
728 which is actually identical to the hypothetical model suggested previously [11,53]. In our kinetic  
729 model, however, this mode is sub-dominant.

730 It is interesting to note that the hand-over-hand motion in the dynein is distinct from that in  
731 kinesin. In kinesin, chemical events in both heads are more tightly coordinated. Starting from  
732 the two-head bound states, the ATP hydrolysis in the lagging head reduces its binding affinity to  
733 MT and results in the dissociation from the MT. The ATP-dependent neck-linker docking (clas-  
734 sically called neck-linker power-stroke) occurs in the originally leading head. On the other  
735 hand, the hand-over-hand motion found in our model dynein contains the full of ATP-hydroly-  
736 sis cycle in the originally lagging motor domain, while the originally leading domain stays in  
737 the ADP-bound state. The ATP-dependent power-stroke occurs in the originally lagging motor  
738 domain.

739

#### 740 **Bipedal motion under external force**

741 It has been suggested that a load exerted by bound cargos speeds up dynein movements by acti-  
742 vating some conformational changes. However, our model propose a possibility that this in-  
743 crease in the velocity under load is an intrinsic feature of the dynein motor domain. As in Fig  
744 2D, the velocity slightly increased with a weak external force; e.g., at [ATP] = 1 mM, the veloc-  
745 ity with 0.5 pN external force was larger than that without external force. This slight increase in  
746 the velocity under a weak opposing force was also reported in previous experimental studies  
747 [40,57]. The load-dependent cancellation of dynein auto-inhibition has been proposed for the  
748 cause of the phenomenon, however, the molecular basis for such cancellation was still obscure.  
749 Our model analysis may partly explain the reason for acceleration of dynein motility under a  
750 small backward load.

751 In order to understand the underlying mechanism of this increase, we sought the differ-  
752 ence in the paths with and without 0.5 pN of external force. We extracted fragments of paths  
753 that are significantly more frequent with the 0.5 pN force compared to the case of no force (Path  
754 6, depicted in Fig 7)

755 Path 6: 2TDM+  $\rightarrow$  3T\*DM+  $\rightarrow$  4D\*MDM+  $\rightarrow$  24D\*MD+  $\rightarrow$  49D\*MD0  $\rightarrow$

756 74D\*MD-  $\rightarrow$  46DMD0  $\rightarrow$  26DMDM0

757

758**Fig 7:** Paths observed in the case of 0.5pN external force more frequently than the case of no  
759external force. Schematic diagrams and the whole network are drawn on the left and the right,  
760respectively.

761

762In the first half of the path 6, the leading red motor domain takes the ATP hydrolysis reaction,  
763which inevitably peels out the lagging motor domain from MT due to the internal force. We  
764then ask why this path was enhanced by the 0.5pN force. First, total incoming flows to 2TDM+  
765were equally probable with and without the external force. Second, the transition from 2TDM+  
766to 3T\*DM+ was notably enhanced by the external force. Without the external force, the  
7672TDM+ state tends to make a transition to 2TDM0 via backward diffusion of the red domain.  
768The external force affects this route in two mutually opposing mechanisms: 1) The backward  
769diffusion is accelerated by the external force as in eq. (5), which increases the transition to  
7702TDM0. 2) The MT-bound blue motor domain receives the half of external force in 2TDM0  
771state, but not in 2TDM+ state, which suggests that the 2TDM0 has extra energy cost due to ex-  
772ternal-force based factor  $f_{ext}(F/2) = 10^{(F pN)}$ , which thus reduces the transition to 2TDM0. In  
773fact, the two effects are nearly cancelled out, but, in our current estimate, the second effect is  
774slightly larger. This inhibitory effect to 2TDM0 explains the slight increase in the transition fre-  
775quency to 3T\*DM+. We, however, note that our estimate in the second effect comes from the  
776experimental data of detachment force for *Dictyostelium* dynein, which contain some uncer-  
777tainty. If the detachment force were 3 pN, for example, instead of 2 pN used here, the second ef-  
778fect would be weaker than the first effect, and thus we may not see the slight increase in the ve-  
779locity upon a weak external force.

780

### 781**Effects of internal force and diffusion rates**

782 Our model contains some parameters of which appropriate values are hardly known from  
783experiments to date. Here, we address effects of two such parameter values; the internal force  
784factor,  $f_{\dot{\epsilon}\dot{\epsilon}}$ , and the diffusion rates,  $\lambda = \lambda_{for} = \lambda_{back}$  without the external force. As the default,  
785we set  $f_{\dot{\epsilon}\dot{\epsilon}=10000\dot{\epsilon}}$  and  $\lambda=200$ . Here, we repeated the same simulations with three other parame-  
786ter choices and compared them with the default one (S3 Fig). (1)  $f_{\dot{\epsilon}\dot{\epsilon}=10000\dot{\epsilon}}$  and  $\lambda=200$  (the de-  
787fault set), (2)  $f_{\dot{\epsilon}\dot{\epsilon}=1\dot{\epsilon}}$  and  $\lambda=200$ , (3)  $f_{\dot{\epsilon}\dot{\epsilon}=10000\dot{\epsilon}}$  and  $\lambda=500$ , and (4)  $f_{\dot{\epsilon}\dot{\epsilon}=10000\dot{\epsilon}}$  and  $\lambda=1000$ .  
788We plot the results for run-lengths (S3A and S3B Fig) and velocities (S3C and S3D Fig) as  
789functions of [ATP] (S3A and S3C Fig) and the external force (S3B and S3D Fig). The [ATP]

790dependence was tested with no external force. The external force dependence was investigated  
791with  $[ATP] = 1$  mM.

792 At first, the two major features were kept for all the cases. 1) The model dynein does not  
793move uni-directionally without ATP. 2) The run-length decreased as  $[ATP]$  increased.

794 Looking into the effect of the diffusion rate  $\lambda$ , we find that all the results for the cases (1),  
795(3), and (4) are rather similar each other, suggesting that the diffusion rate value does not affect  
796the overall behavior significantly.

797 When we removed the effect of internal force  $f_{\text{ii}}$  in (2)(green curves in S3 Fig), the run-  
798length at higher  $[ATP]$  becomes longer, compared to the default set (1) that contains internal  
799force (S3A Fig), while the velocity is significantly lower than the default case (S3C Fig). Thus,  
800the system that lacks the internal force effect tends to bind more strongly to the MT, making the  
801run-length longer and the velocity lower. The effect of the internal force,  $f_{\text{ii}}$ , is to accelerate  
802the dissociation of the lagging motor domain ( $DM \rightarrow D$ ), which facilitates the forward step of  
803that domain increasing the velocity in one hand, and enhances the detachment of the entire  
804dynein from MT thus decreasing the run length in the other hand.

805

806 Next, we examined the walking mechanisms in different  $f_{\text{ii}}$  and  $\lambda$  setups (S3E Fig). It is  
807clear that in the system without the internal force  $f=1$ , the hand-over-hand moves become  
808more prominent, while the inchworm moves are less probable, compared to the default case  
809with the internal force. This is because the pathway;  $1DMDM^+ \rightarrow 21DMD^+ \rightarrow 46DMD0 \rightarrow$   
810 $26DMDM0$ , observed frequently in the default case  $f=10000$  is less prominent for the case of  
811 $f=1$ , due to the deceleration of the first step in this pathway. In the transition  $1DMDM^+ \rightarrow$   
812 $21DMD^+$ , the dissociation of the lagging motor domain is facilitated by the presence of the in-  
813ternal force. At the same time, when the lagging motor domain detaches from MT, it binds ATP  
814leading to the hand-over-hand motions. Therefore, the internal force is important for the charac-  
815teristic walking manner, inchworm motion.

816 Additionally, we also notice larger diffusion constant value shows slight increase in the  
817inchworm motions. This is because the motor domain often moves diffusively twice within one  
818ATP cycle in the case of large  $\lambda$  value, and so the lagging motor domain tends to detach via in-  
819ternal force and moves to the forward direction. When it then binds to MT, this pathway goes to  
820 $26DMDM0$ , regarded as the inchworm motions.

821

## 822Limitation and future prospect

823 As discussed, our kinetic model includes some parameters which are not derived from experi-  
824ments or which are taken from experiments with mixed conditions such as different species or  
825different ionic strengths. In particular, data on the effect of external force were missing for *Dic-*  
826*tyostelium* dynein due to inherently weaker MT binding affinity of *Dictyostelium* dynein than  
827those from yeast or human. However, since the time courses of movements have been mea-  
828sured, we could infer these model parameters via Bayesian approaches, which is kept for future  
829studies.

830 In addition, for simplicity, we limit ourselves the relative positions of the two motor do-  
831mains being +8 nm, 0 nm, or -8 nm. It is straightforward to extend it to 16 nm or 24 nm to make  
832it closer to experimental estimates. Limiting the relative position to discrete states is perhaps not  
833an ideal setup. Extending it to continuous value would be desired. Moreover, it has been known  
834that dynein occasionally make sidesteps to different protofilaments, which, for simplicity, we  
835have not included in the model.

836

837

## 838 **Conclusion**

839

840 We proposed a kinetic model for bipedal motions of cytoplasmic dynein, simulated it via the  
841 Gillespie Monte Carlo method obtaining results consistent with many of previous motility ex-  
842periments. The detailed pathway analysis provided new and versatile molecular mechanisms of  
843bipedal motions of dynein, including the inchworm motions and the hand-over-hand motions.  
844 The kinetic model contains the 5 states of each motor domain based on the ATP-dependent  
845 structural changes in the linker and the MTBD, as well as 3 states for relative position of the  
846 two motor domain, resulting into  $5 \times 5 \times 3 = 75$  states together. The master equation in this 75  
847 states was solved by the Gillespie algorithm. As a result, with a single parameter set, we suc-  
848 cessfully reproduced many characteristic behavior of dynein found in previous experiments; the  
849 inchworm motions as the dominant mode, the hand-over-hand motions, backsteps, and stagna-  
850 tion. Our model suggests that, in the prominent inchworm movement, only the leading motor  
851 domain moves via the ATP-dependent linker power-stroke motions, while the lagging motor do-  
852 main is moved diffusively dragged by the leading domain. In addition, the hand-over-hand mo-  
853 tion in the model dynein is distinct from that of kinesin by the usage of the power-stroke.

854

855

856

## 857 **Supporting Information**

858

### 859 **Supporting Figure Caption**

860 **Fig S1: Effects of internal forces.** The model takes into account the asymmetric detachment  
861 rates of the motor domain; when both domains are bound on MT, the lagging domain dissoci-  
862 ates more rapidly than the leading domain. In the master equation approach, the effect is real-  
863 ized by introducing a multiplying/dividing factor,  $f_{\text{int}}$  in the transition rates, which implies the  
864 changes in the free energy by  $\ln(f_{\text{int}})$ . Taking care of the detailed balance, we need to introduce  
865 the same factor in many transitions connected in the kinetic network. The introduced multiply-  
866 ing/dividing factors are defined in the figure.

867

868 **Fig S2: All the 10000 trajectories superimposed for various [ATP] and external forces.**

869

870 **Fig S3:** Motility with different model parameters are examined.

871



## 872References

8731. Vallee RB, Williams JC, Varma D, Barnhart LE. Dynein: An Ancient Motor Protein  
874 Involved in Multiple Modes of Transport. *J Neurobiol.* 2004;58: 189–200.  
875 doi:10.1002/neu.10314
8762. Bhabha G, Johnson GT, Schroeder CM, Vale RD. How Dynein Moves Along  
877 Microtubules. *Trends in Biochemical Sciences.* 2016. pp. 94–105.  
878 doi:10.1016/j.tibs.2015.11.004
8793. Schmidt H, Carter AP. Review: Structure and mechanism of the dynein motor ATPase.  
880 *Biopolymers.* 2016. pp. 557–567. doi:10.1002/bip.22856
8814. Vale RD. The Molecular Motor Toolbox for Intracellular Transport. *Cell.* 2003;112:  
882 467–480. doi:10.1016/S0092-8674(03)00111-9
8835. Yildiz A, Tomishige M, Vale RD, Selvin PR. Kinesin Walks Hand-Over-Hand. *Science*  
884 (80- ). 2004;303: 676–678. doi:10.1126/science.1093753
8856. Kaseda K, Higuchi H, Hirose K. Alternate fast and slow stepping of a heterodimeric  
886 kinesin molecule. *Nat Cell Biol.* 2003;5: 1079–1082. doi:10.1038/ncb1067
8877. Kaseda K, Higuchi H, Hirose K. Coordination of kinesin's two heads studied with  
888 mutant heterodimers. *Proc Natl Acad Sci U S A.* 2002;99: 16058–16063.  
889 doi:10.1073/pnas.252409199
8908. Reck-Peterson SL, Yildiz A, Carter AP, Gennerich A, Zhang N, Vale RD. Single-  
891 Molecule Analysis of Dynein Processivity and Stepping Behavior. *Cell.* 2006;126: 335–  
892 348. doi:10.1016/j.cell.2006.05.046
8939. Gennerich A, Carter AP, Reck-Peterson SL, Vale RD. Force-Induced Bidirectional  
894 Stepping of Cytoplasmic Dynein. *Cell.* 2007;131: 952–965.  
895 doi:10.1016/j.cell.2007.10.016
89610. Qiu W, Derr ND, Goodman BS, Villa E, Wu D, Shih W, et al. Dynein achieves  
897 processive motion using both stochastic and coordinated stepping. *Nat Struct Mol Biol.*  
898 2012;19: 193–200. doi:10.1038/nsmb.2205.Dynein
89911. DeWitt MA, Chang AY, Combs PA, Yildiz A. Cytoplasmic dynein moves through  
900 uncoordinated stepping of the AAA+ ring domains. *Science* (80- ). 2012;335: 221–225.  
901 doi:10.1126/science.1215804
90212. Toba S, Watanabe TM, Yamaguchi-Okimoto L, Toyoshima YY, Higuchi H.  
903 Overlapping hand-over-hand mechanism of single molecular motility of cytoplasmic  
904 dynein. *Proc Natl Acad Sci.* 2006;103: 5741–5745. doi:10.1073/pnas.0508511103

90513. Shima T, Imamula K, Kon T, Ohkura R, Sutoh K. Head-head coordination is required  
906 for the processive motion of cytoplasmic dynein, an AAA+ molecular motor. *J Struct*  
907 *Biol.* 2006;156: 182–189. doi:10.1016/j.jsb.2006.03.014
90814. Gibbons IR, Gibbons BH, Mocz G, Asai DJ. Multiple nucleotide-binding sites in the  
909 sequence of dynein beta heavy chain. *Nature.* 1991;352: 640–3. doi:10.1038/352640a0
91015. Kon T, Nishiura M, Ohkura R, Toyoshima YY, Sutoh K. Distinct Functions of  
911 Nucleotide-Binding / Hydrolysis Sites in the Four AAA Modules of Cytoplasmic  
912 Dynein. *Biochemistry.* 2004;43: 11266–11274.
91316. Asai DJ, Koonce MP. The dynein heavy chain: Structure, mechanics and evolution.  
914 *Trends Cell Biol.* 2001;11: 196–202. doi:10.1016/S0962-8924(01)01970-5
91517. Burgess S a, Walker ML, Sakakibara H, Knight PJ, Oiwa K. Dynein structure and power  
916 stroke. *Nature.* 2003;421: 715–718. doi:10.1038/nature01377
91718. Roberts AJ, Kon T, Knight PJ, Sutoh K, Burgess SA. Functions and mechanics of  
918 dynein motor proteins. *Nat Rev Mol Cell Biol.* Nature Publishing Group; 2013;14: 713–  
919 26. doi:10.1038/nrm3667
92019. Cianfrocco M a., DeSantis ME, Leschziner AE, Reck-Peterson SL. Mechanism and  
921 Regulation of Cytoplasmic Dynein. *Annu Rev Cell Dev Biol.* 2015;31: 83–108.  
922 doi:10.1146/annurev-cellbio-100814-125438
92320. Imamula K, Kon T, Ohkura R, Sutoh K. The coordination of cyclic microtubule  
924 association/dissociation and tail swing of cytoplasmic dynein. *Proc Natl Acad Sci U S A.*  
925 2007;104: 16134–16139. doi:10.1073/pnas.0702370104
92621. Kon T, Sutoh K, Kurisu G. X-ray structure of a functional full-length dynein motor  
927 domain. *Nat Struct Mol Biol.* Nature Publishing Group; 2011;18: 638–642. doi:10.1038/  
928 nsmb.2074
92922. Kon T, Oyama T, Shimo-Kon R, Imamula K, Shima T, Sutoh K, et al. The 2.8 Å crystal  
930 structure of the dynein motor domain. *Nature.* Nature Publishing Group; 2012;484: 345–  
931 350. doi:10.1038/nature10955
93223. Schmidt H, Gleave ES, Carter AP. Insights into dynein motor domain function from a  
933 3.3 Å crystal structure. *Nat Struct Mol Biol.* Nature Publishing Group; 2012;19: 492–  
934 510. doi:10.1038/nsmb.2272.Insights
93524. Schmidt H, Zalyte R, Urnavicius L, Carter AP. Structure of human cytoplasmic dynein-2  
936 primed for its power stroke. *Nature.* 2015;518. doi:10.1038/nature14023
93725. Roberts AJ, Malkova B, Walker ML, Sakakibara H, Numata N, Kon T, et al. ATP-driven  
938 remodeling of the linker domain in the dynein motor. *Structure.* Elsevier Ltd; 2012;20:  
939 1670–1680. doi:10.1016/j.str.2012.07.003

94026. Kon T, Mogami T, Ohkura R, Nishiura M, Sutoh K. ATP hydrolysis cycle-dependent  
941 tail motions in cytoplasmic dynein. *Nat Struct Mol Biol.* 2005;12: 513–519. doi:10.1038/  
942 nsmb930
94327. Carter AP, Garbarino JE, Wilson-kubalek EM, Wesley E, Cho C, Milligan RA, et al.  
944 Structure and Functional Role of Dynein’s Microtubule-Binding Domain. *Science* (80- ).  
945 2008;322: 1691–1695. doi:10.1126/science.1164424. Structure
94628. Wang Q, Jana B, Diehl MR, Cheung MS, Kolomeisky AB, Onuchic JN. Molecular  
947 mechanisms of the interhead coordination by interhead tension in cytoplasmic dyneins.  
948 *Proc Natl Acad Sci.* 2018;115: 201806688. doi:10.1073/pnas.1806688115
94929. Kubo S, Li W, Takada S. Allosteric conformational change cascade in cytoplasmic  
950 dynein revealed by structure- based molecular simulations. 2017; 1–27.
95130. Goldtzvik Y, Mugnai ML, Thirumalai D. Dynamics of Allosteric Transitions in Dynein.  
952 *Structure.* 2018;26: 1–14. doi:https://doi.org/10.1016/j.str.2018.08.005
95331. Singh MP, Mallik R, Gross SP, Yu CC. Monte Carlo modeling of single-molecule  
954 cytoplasmic dynein. *Proc Natl Acad Sci.* 2005;102: 12059–12064.  
955 doi:10.1073/pnas.0501570102
95632. Yi QG. A simple theoretical model explains Dynein’s response to load. *Biophys J.*  
957 Elsevier; 2006;90: 811–821. doi:10.1529/biophysj.105.073189
95833. Tsygankov D, Serohijos AWR, Dokholyan N V., Elston TC. Kinetic models for the  
959 coordinated stepping of cytoplasmic dynein. *J Chem Phys.* 2009;130.  
960 doi:10.1063/1.3050098
96134. Šarlah A, Vilfan A. The winch model can explain both coordinated and uncoordinated  
962 stepping of cytoplasmic dynein. *Biophys J.* 2014;107: 662–671.  
963 doi:10.1016/j.bpj.2014.06.022
96435. Gillespie DT. Exact Stochastic Simulation of couple chemical reactions. *J Phys Chem.*  
965 1977;81: 2340–2361. doi:10.1021/j100540a008
96636. Schmidt H, Zalyte R, Urnavicius L, Carter AP. Structure of human cytoplasmic dynein-2  
967 primed for its power stroke. *Nature.* Nature Publishing Group; 2015;518: 435–438.  
968 doi:10.1038/nature14023
96937. Mallik R, Carter BC, Lex SA, King SJ, Gross SP. Cytoplasmic dynein functions as a  
970 gear in response to load. *Nature.* 2004;427: 649–652. doi:10.1038/nature02293
97138. Imai H, Shima T, Sutoh K, Walker ML, Knight PJ, Kon T, et al. Direct observation  
972 shows superposition and large scale flexibility within cytoplasmic dynein motors moving  
973 along microtubules. *Nat Commun.* Nature Publishing Group; 2015;6: 1–11. doi:10.1038/  
974 ncomms9179

97539. Roberts AJ, Numata N, Walker ML, Kato YS, Malkova B, Kon T, et al. AAA+ Ring and  
976 Linker Swing Mechanism in the Dynein Motor. *Cell*. Elsevier Inc.; 2009;136: 485–495.  
977 doi:10.1016/j.cell.2008.11.049
97840. Belyy V, Schlager MA, Foster H, Reimer AE, Carter AP, Yildiz A. The mammalian  
979 dynein-dynactin complex is a strong opponent to kinesin in a tug-of-war competition.  
980 *Nat Cell Biol*. 2016;18: 1018–1024. doi:10.1038/ncb3393
98141. Nicholas MP, Berger F, Rao L, Brenner S, Cho C, Gennerich A. Cytoplasmic dynein  
982 regulates its attachment to microtubules via nucleotide state-switched mechanosensing at  
983 multiple AAA domains. *Proc Natl Acad Sci U S A*. 2015;112: 6371–6376.  
984 doi:10.1073/pnas.1417422112
98542. DeWitt M a, Cypranowska C a, Cleary FB, Belyy V, Yildiz A. The AAA3 domain of  
986 cytoplasmic dynein acts as a switch to facilitate microtubule release. *Nat Struct Mol*  
987 *Biol*. Nature Publishing Group; 2015;22: 73–80. doi:10.1038/nsmb.2930
98843. Kon T, Shima T, Sutoh K. Cytoplasmic dynein: Its atpase cycle and atpase-dependent  
989 structural changes [Internet]. *Comprehensive Biophysics*. Elsevier Ltd.; 2012.  
990 doi:10.1016/B978-0-12-374920-8.00424-0
99144. Hirakawa E, Higuchi H, Toyoshima YY. Processive movement of single 22S dynein  
992 molecules occurs only at low ATP concentrations. *Proc Natl Acad Sci*. 2000;97: 2533–  
993 2537. doi:10.1073/pnas.050585297
99445. Walter WJ, Koonce MP, Brenner B, Steffen W. Two independent switches regulate  
995 cytoplasmic dynein’s processivity and directionality. *Proc Natl Acad Sci*. 2012;109:  
996 5289–5293. doi:10.1073/pnas.1116315109
99746. Mallik R, Petrov D, Lex SA, King SJ, Gross SP. Building complexity: An in vitro study  
998 of cytoplasmic dynein with in vivo implications. *Curr Biol*. 2005;15: 2075–2085.  
999 doi:10.1016/j.cub.2005.10.039
100047. Numata N, Shima T, Ohkura R, Kon T, Sutoh K. C-sequence of the Dictyostelium  
1001 cytoplasmic dynein participates in processivity modulation. *FEBS Lett*. Federation of  
1002 European Biochemical Societies; 2011;585: 1185–1190.  
1003 doi:10.1016/j.febslet.2011.03.036
100448. McKenney RJ, Huynh W, Tanenbaum ME, Bhabha G, Vale RD. Activation of  
1005 cytoplasmic dynein motility by dynactin-cargo adapter complexes. *Science* (80- ).  
1006 2014;345: 337–341. doi:doi:10.1126/science.1254198
100749. Cho C, Reck-Peterson SL, Vale RD. Regulatory ATPase Sites of Cytoplasmic Dynein  
1008 Affect Processivity and Force Generation. *J Biol Chem*. 2008;283: 25839–25845.  
1009 doi:10.1074/jbc.M802951200

101050. Cleary FB, Dewitt MA, Bilyard T, Htet ZM, Belyy V, Chan DD, et al. Tension on the  
1011 linker gates the ATP-dependent release of dynein from microtubules. *Nat Commun.*  
1012 2014;5. doi:10.1038/ncomms5587
101351. Imai H, Shima T, Sutoh K, Walker ML, Knight PJ, Kon T, et al. Direct observation  
1014 shows superposition and large scale flexibility within cytoplasmic dynein motors moving  
1015 along microtubules. *Nat Commun.* 2015;6. doi:10.1038/ncomms9179
101652. Lippert LG, Dadosh T, Hadden JA, Karnawat V, Diroll BT, Murray CB, et al. Angular  
1017 measurements of the dynein ring reveal a stepping mechanism dependent on a flexible  
1018 stalk. *Proc Natl Acad Sci.* 2017;114: E4564–E4573. doi:10.1073/pnas.1620149114
101953. Lippert LG, Dadosh T, Hadden JA, Karnawat V, Diroll BT, Murray CB, et al. Angular  
1020 measurements of the dynein ring reveal a stepping mechanism dependent on a flexible  
1021 stalk. *Proc Natl Acad Sci.* 2017;114: E4564–E4573. doi:10.1073/pnas.1620149114
102254. Velankar SS, Soutanas P, Dillingham MS, Subramanya HS, Wigley DB. Crystal  
1023 structures of complexes of PcrA DNA helicase with a DNA substrate indicate an  
1024 inchworm mechanism. *Cell.* 1999;97: 75–84. doi:10.1016/S0092-8674(00)80716-3
102555. Clapier CR, Iwasa J, Cairns BR, Peterson CL. Mechanisms of action and regulation of  
1026 ATP-dependent chromatin-remodelling complexes. *Nat Rev Mol Cell Biol.* Nature  
1027 Publishing Group; 2017;18: 407–422. doi:10.1038/nrm.2017.26
102856. Brandani GB, Takada S. Chromatin remodelers couple inchworm motion with twist-  
1029 defect formation to slide nucleosomal DNA. *PLoS Comput Biol.* 2018;14: e1006512.  
1030 doi:<https://doi.org/10.1371/journal.pcbi.1006512> November
103157. Torisawa T, Ichikawa M, Furuta A, Saito K, Oiwa K, Kojima H, et al. Autoinhibition  
1032 and cooperative activation mechanisms of cytoplasmic dynein. *Nat Cell Biol.* 2014;16:  
1033 1118–1124. doi:10.1038/ncb3048
- 1034

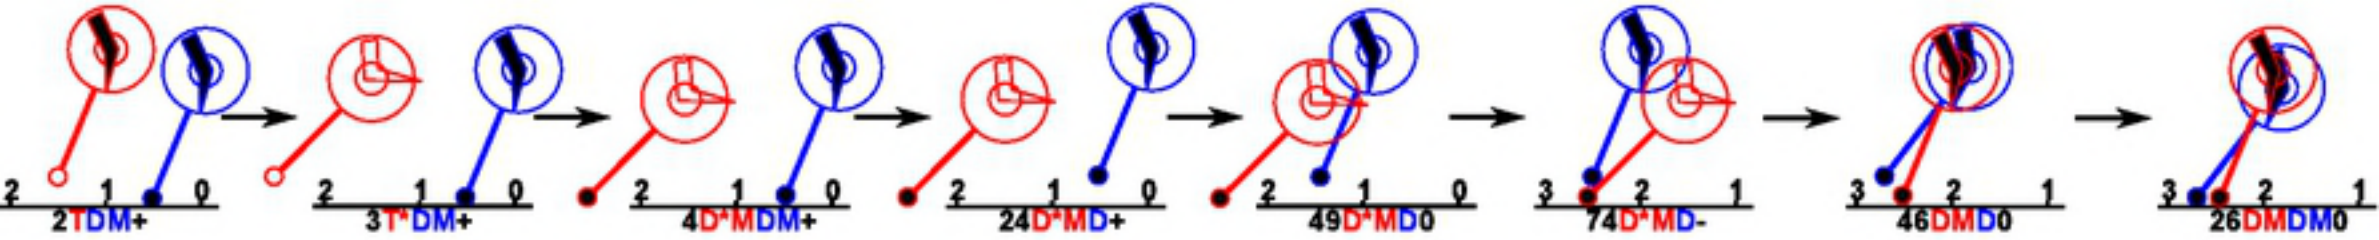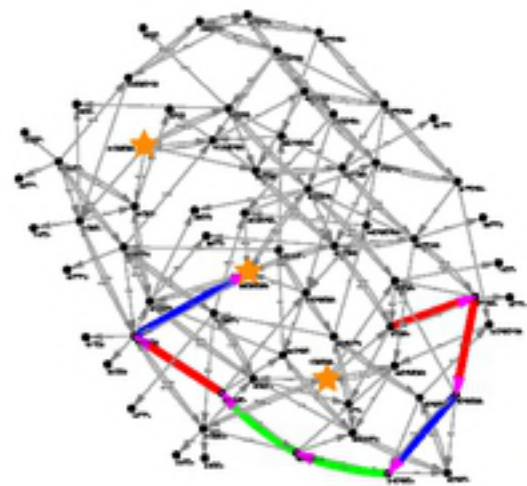

figure7



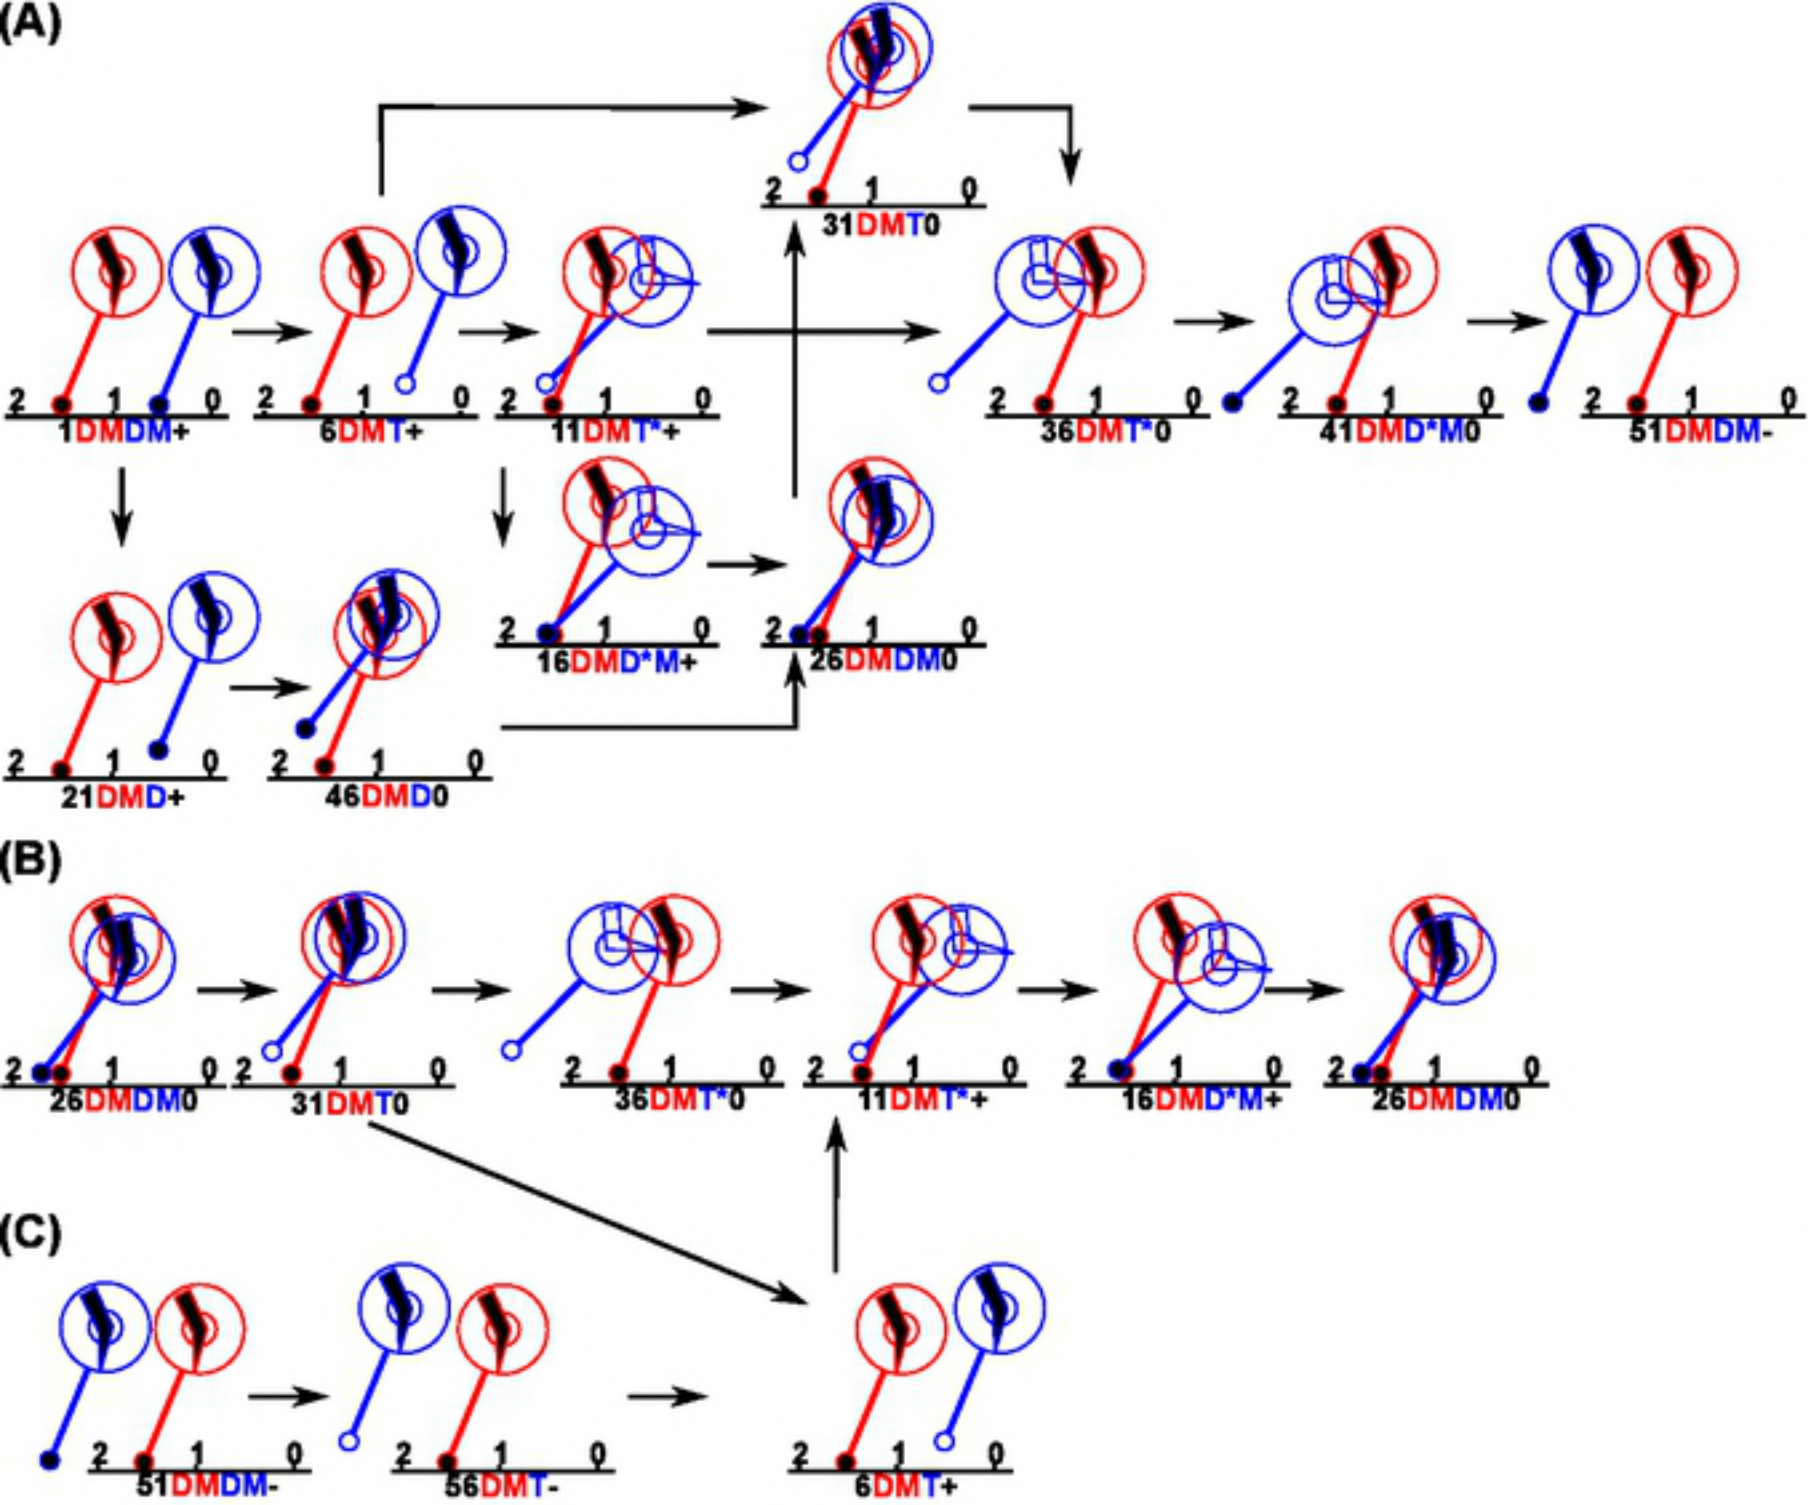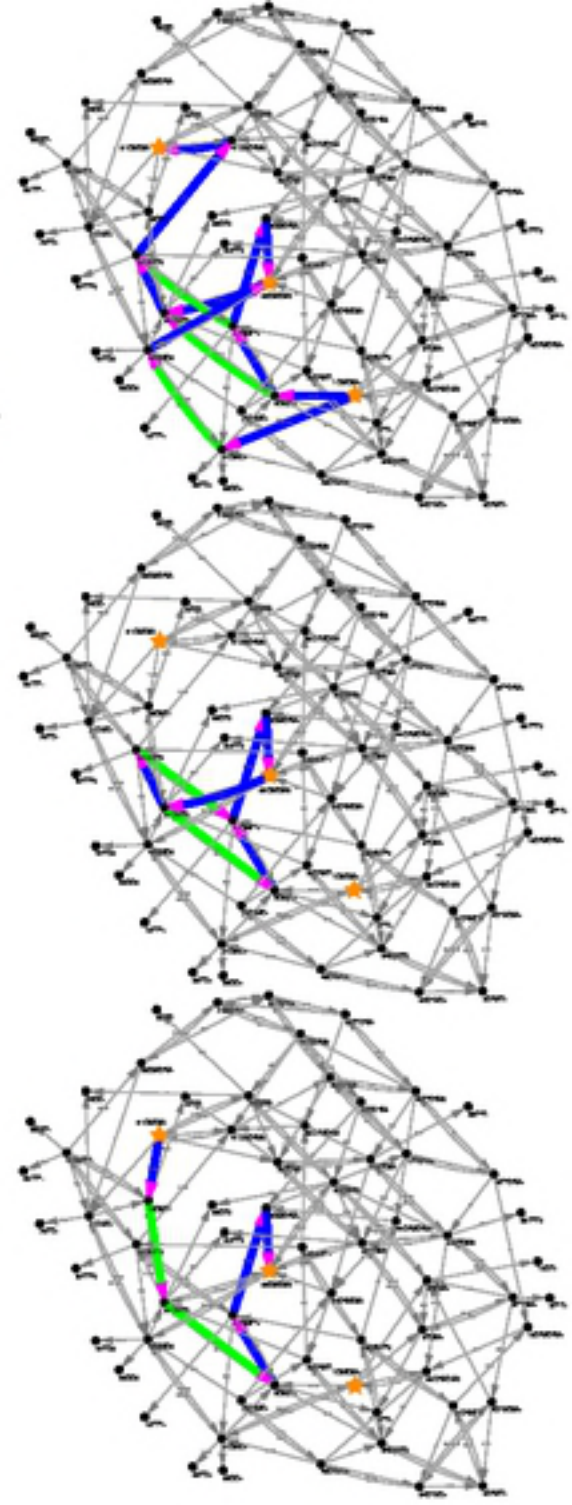

figure6



(A)

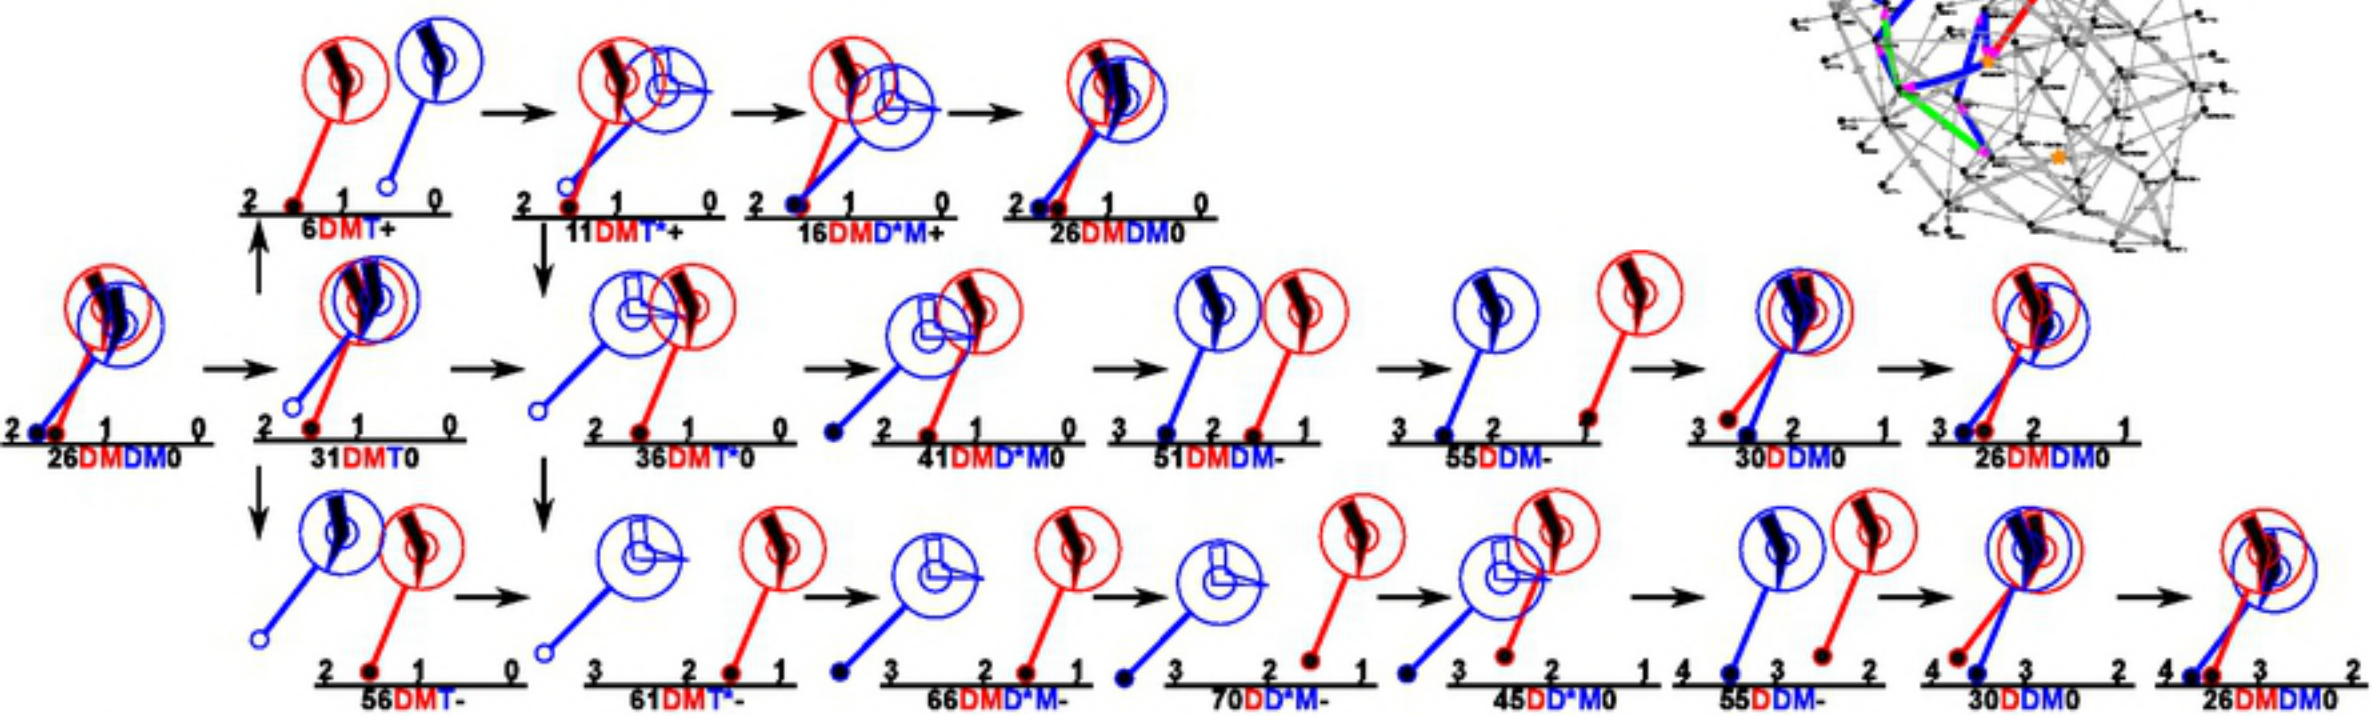

(B)

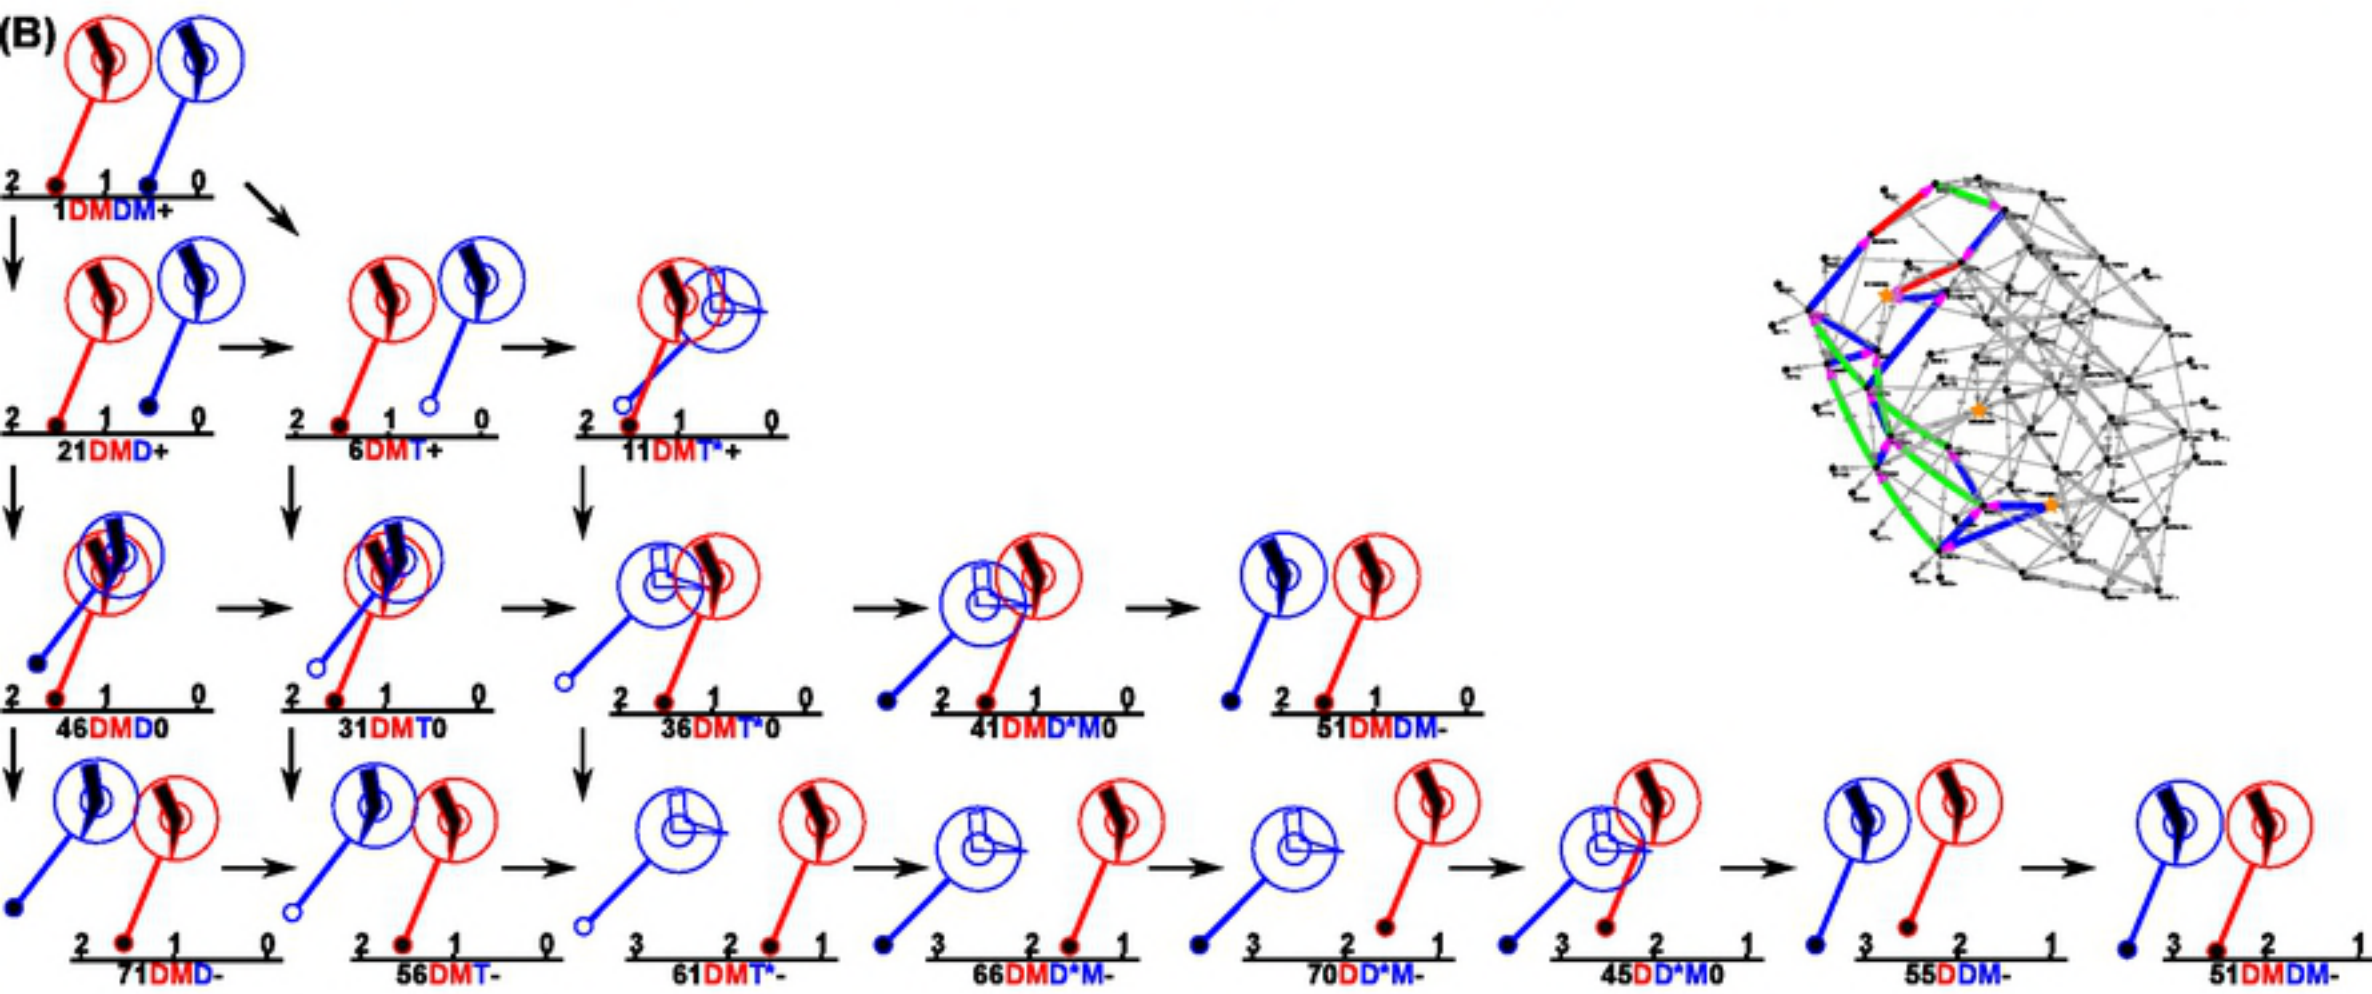

figure5





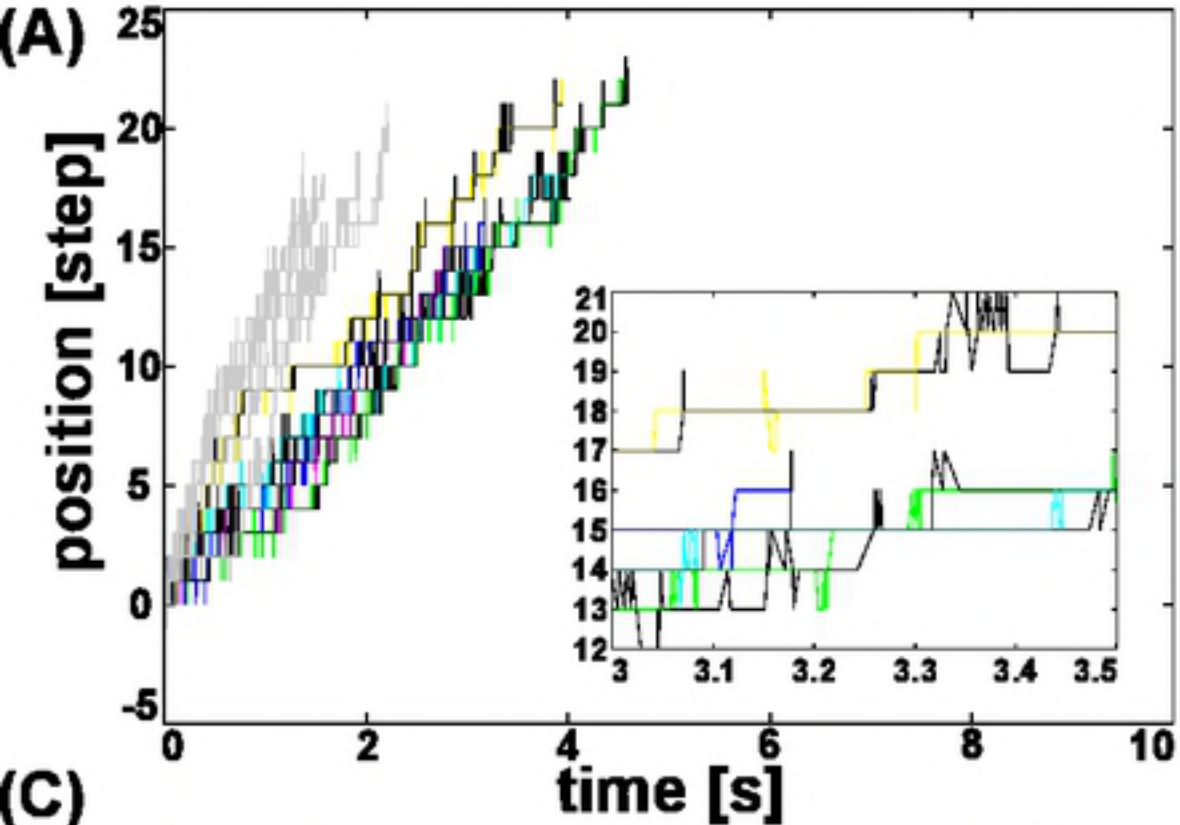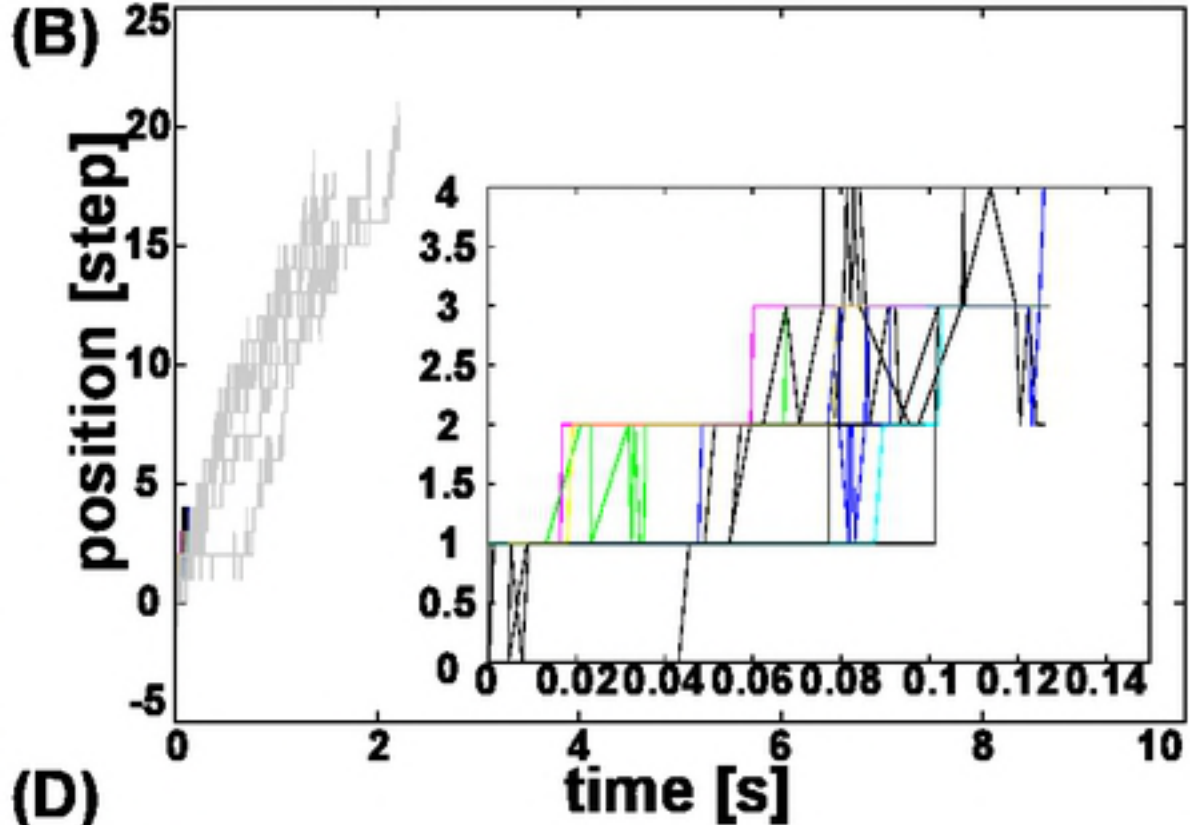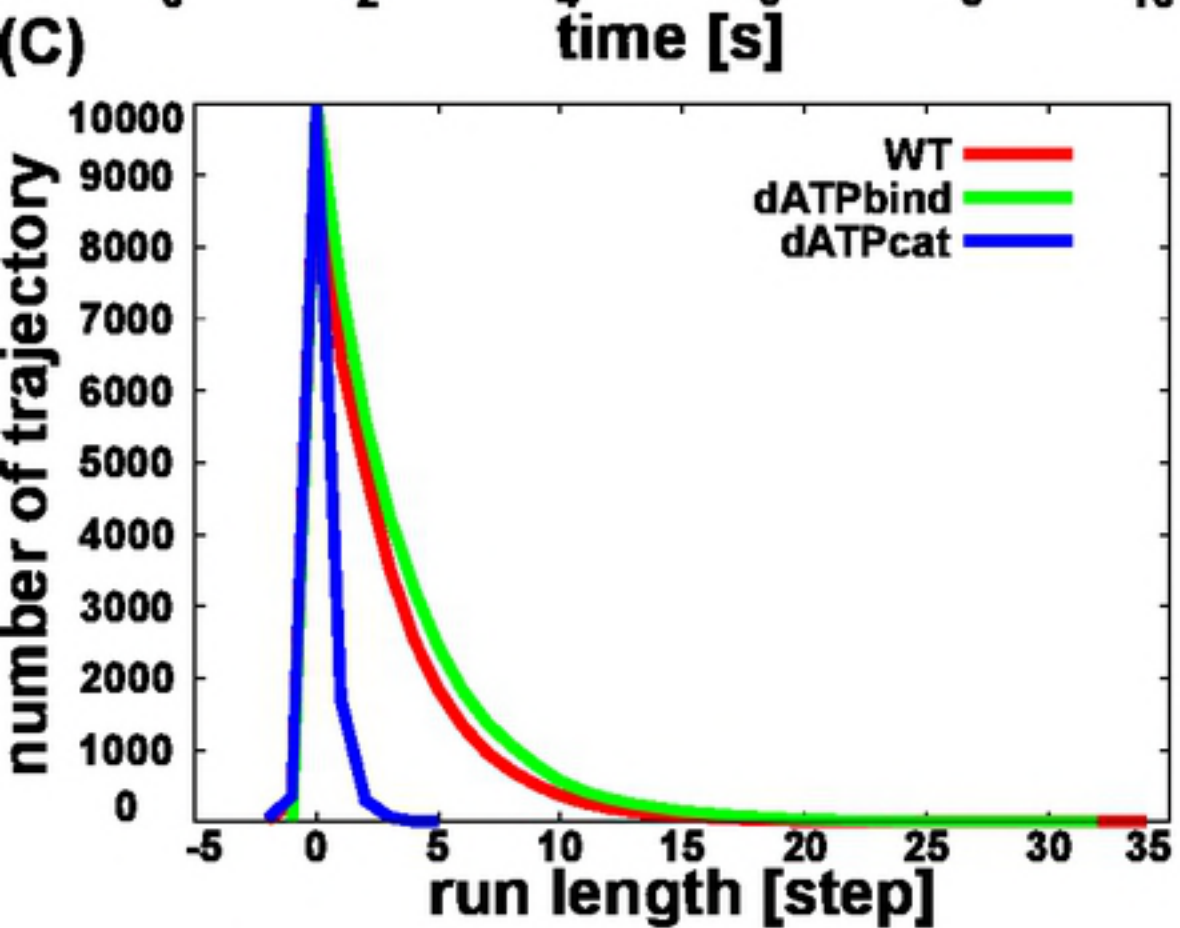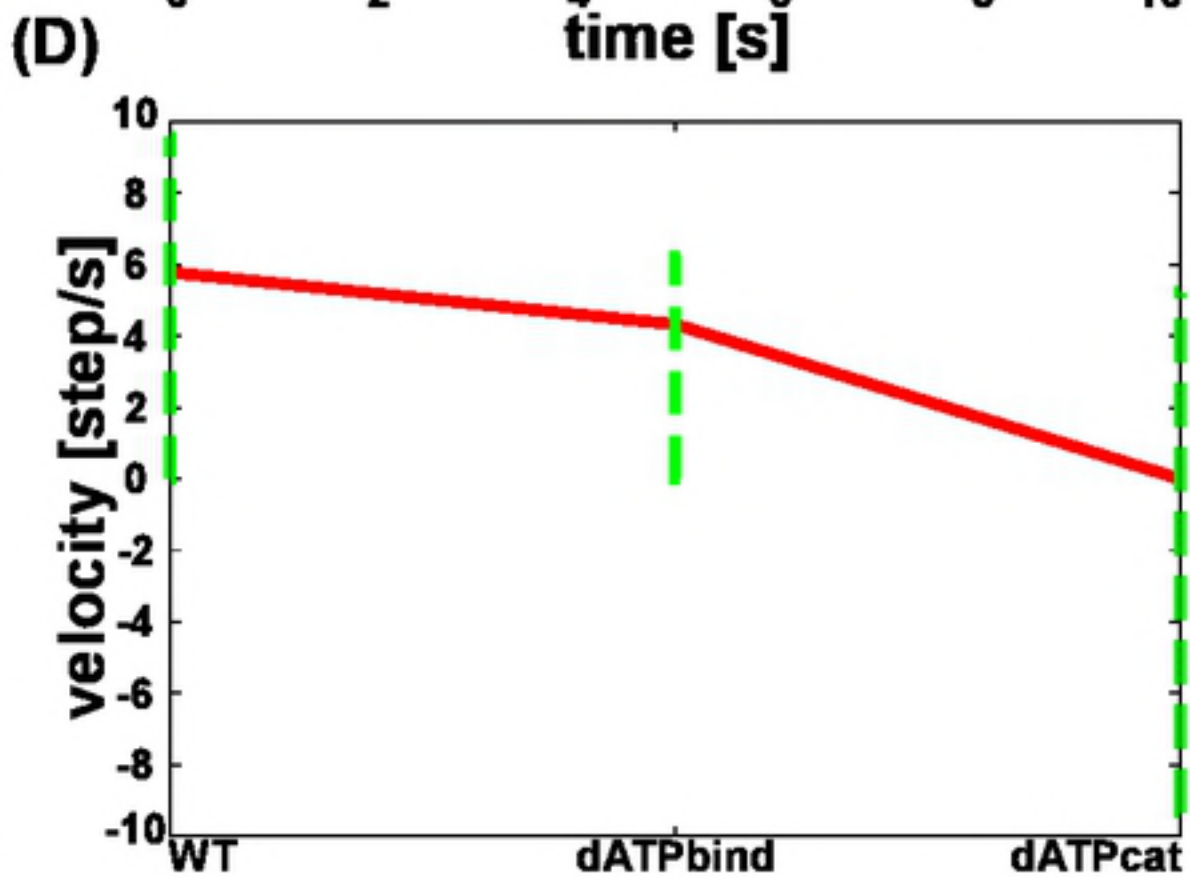

figure3



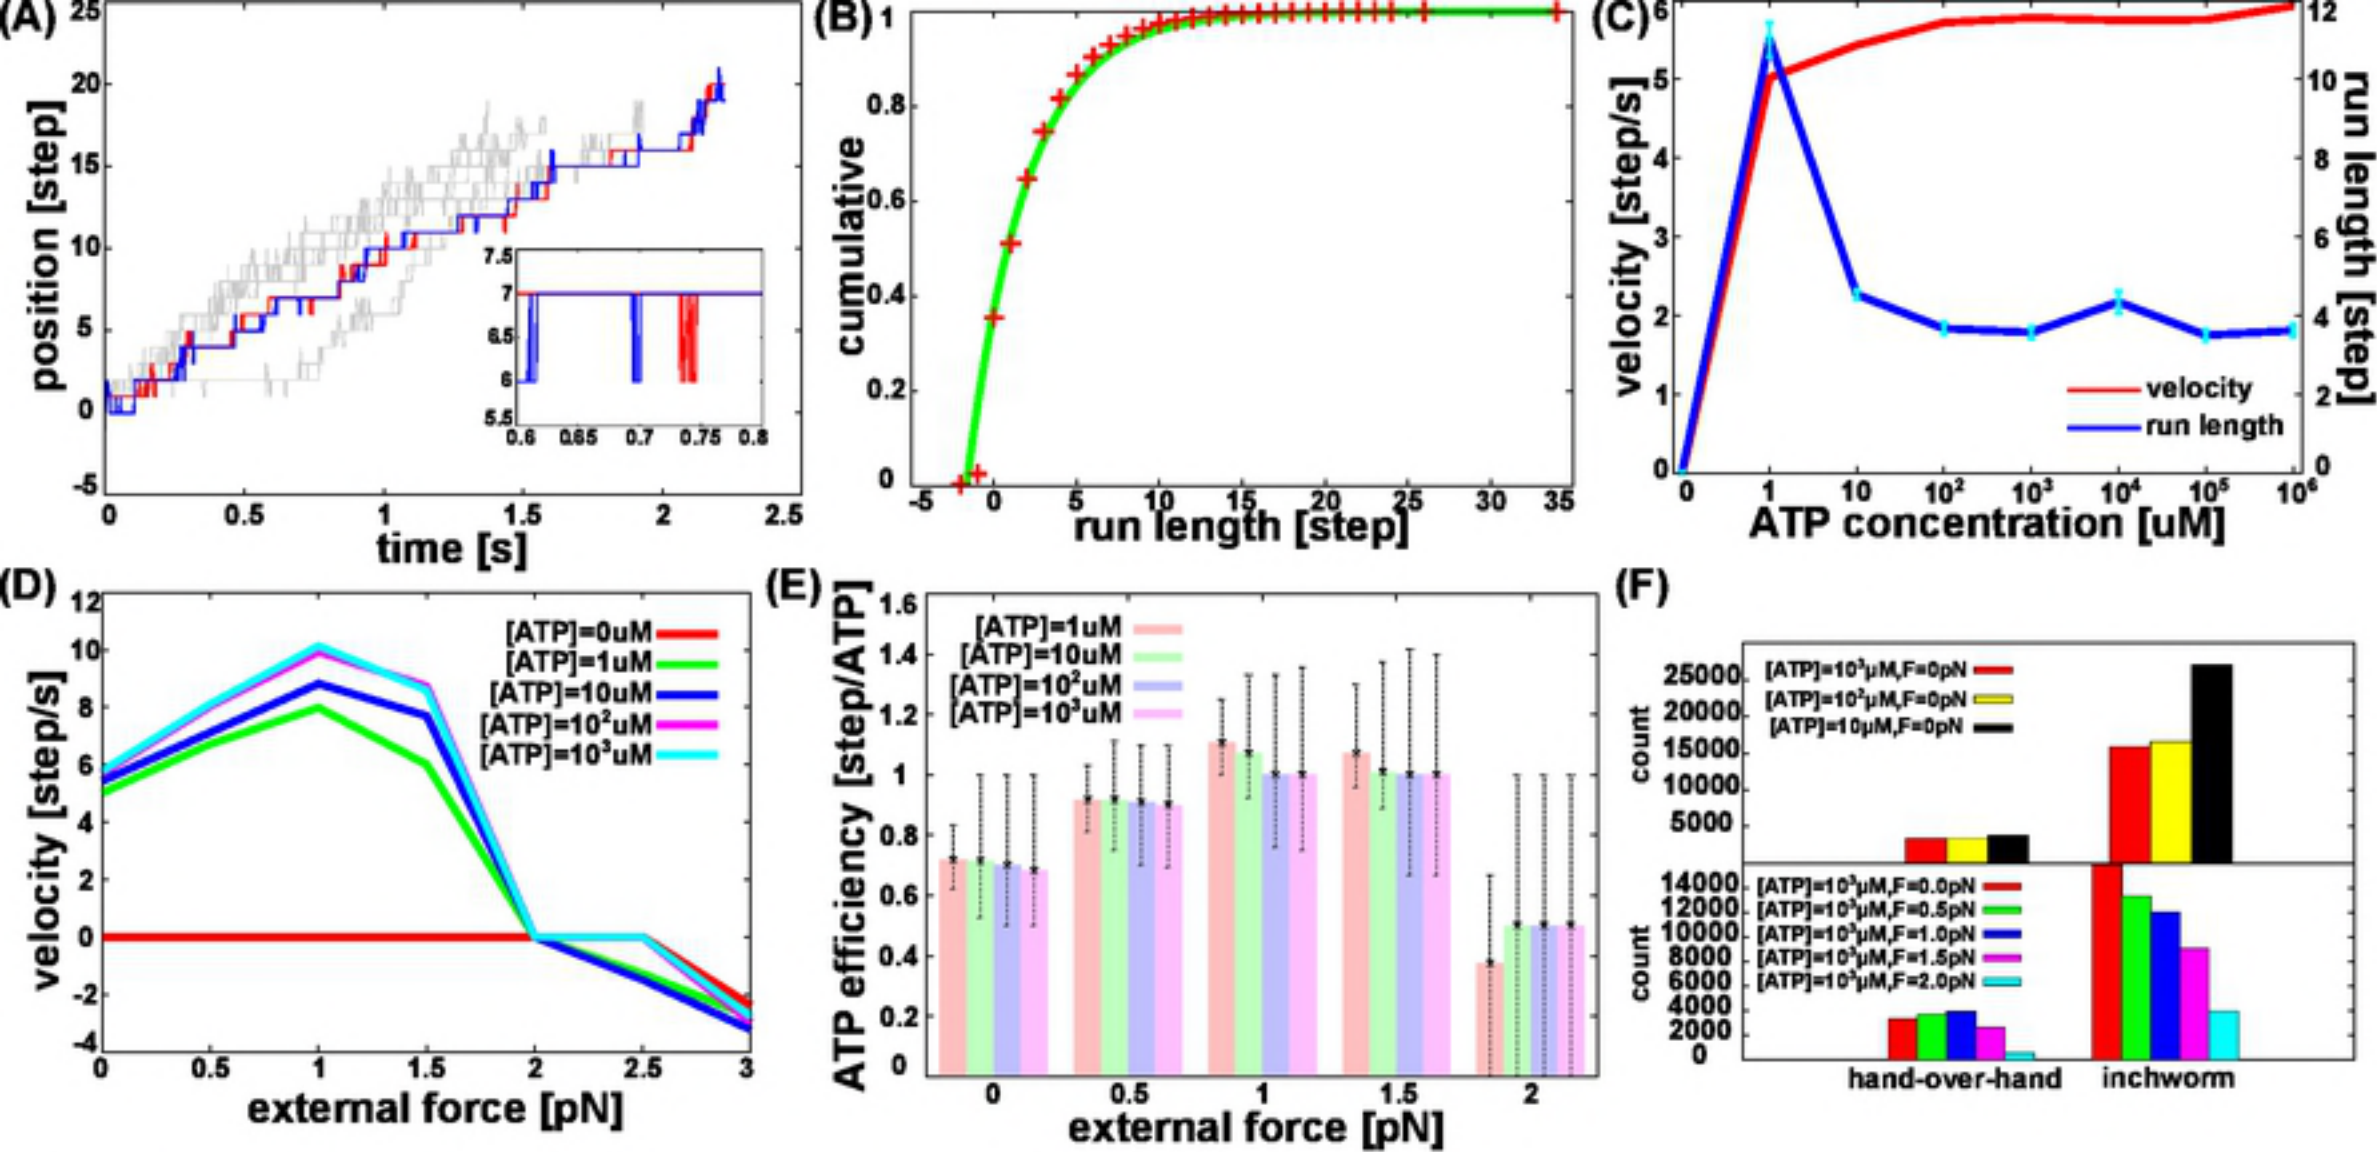

figure2

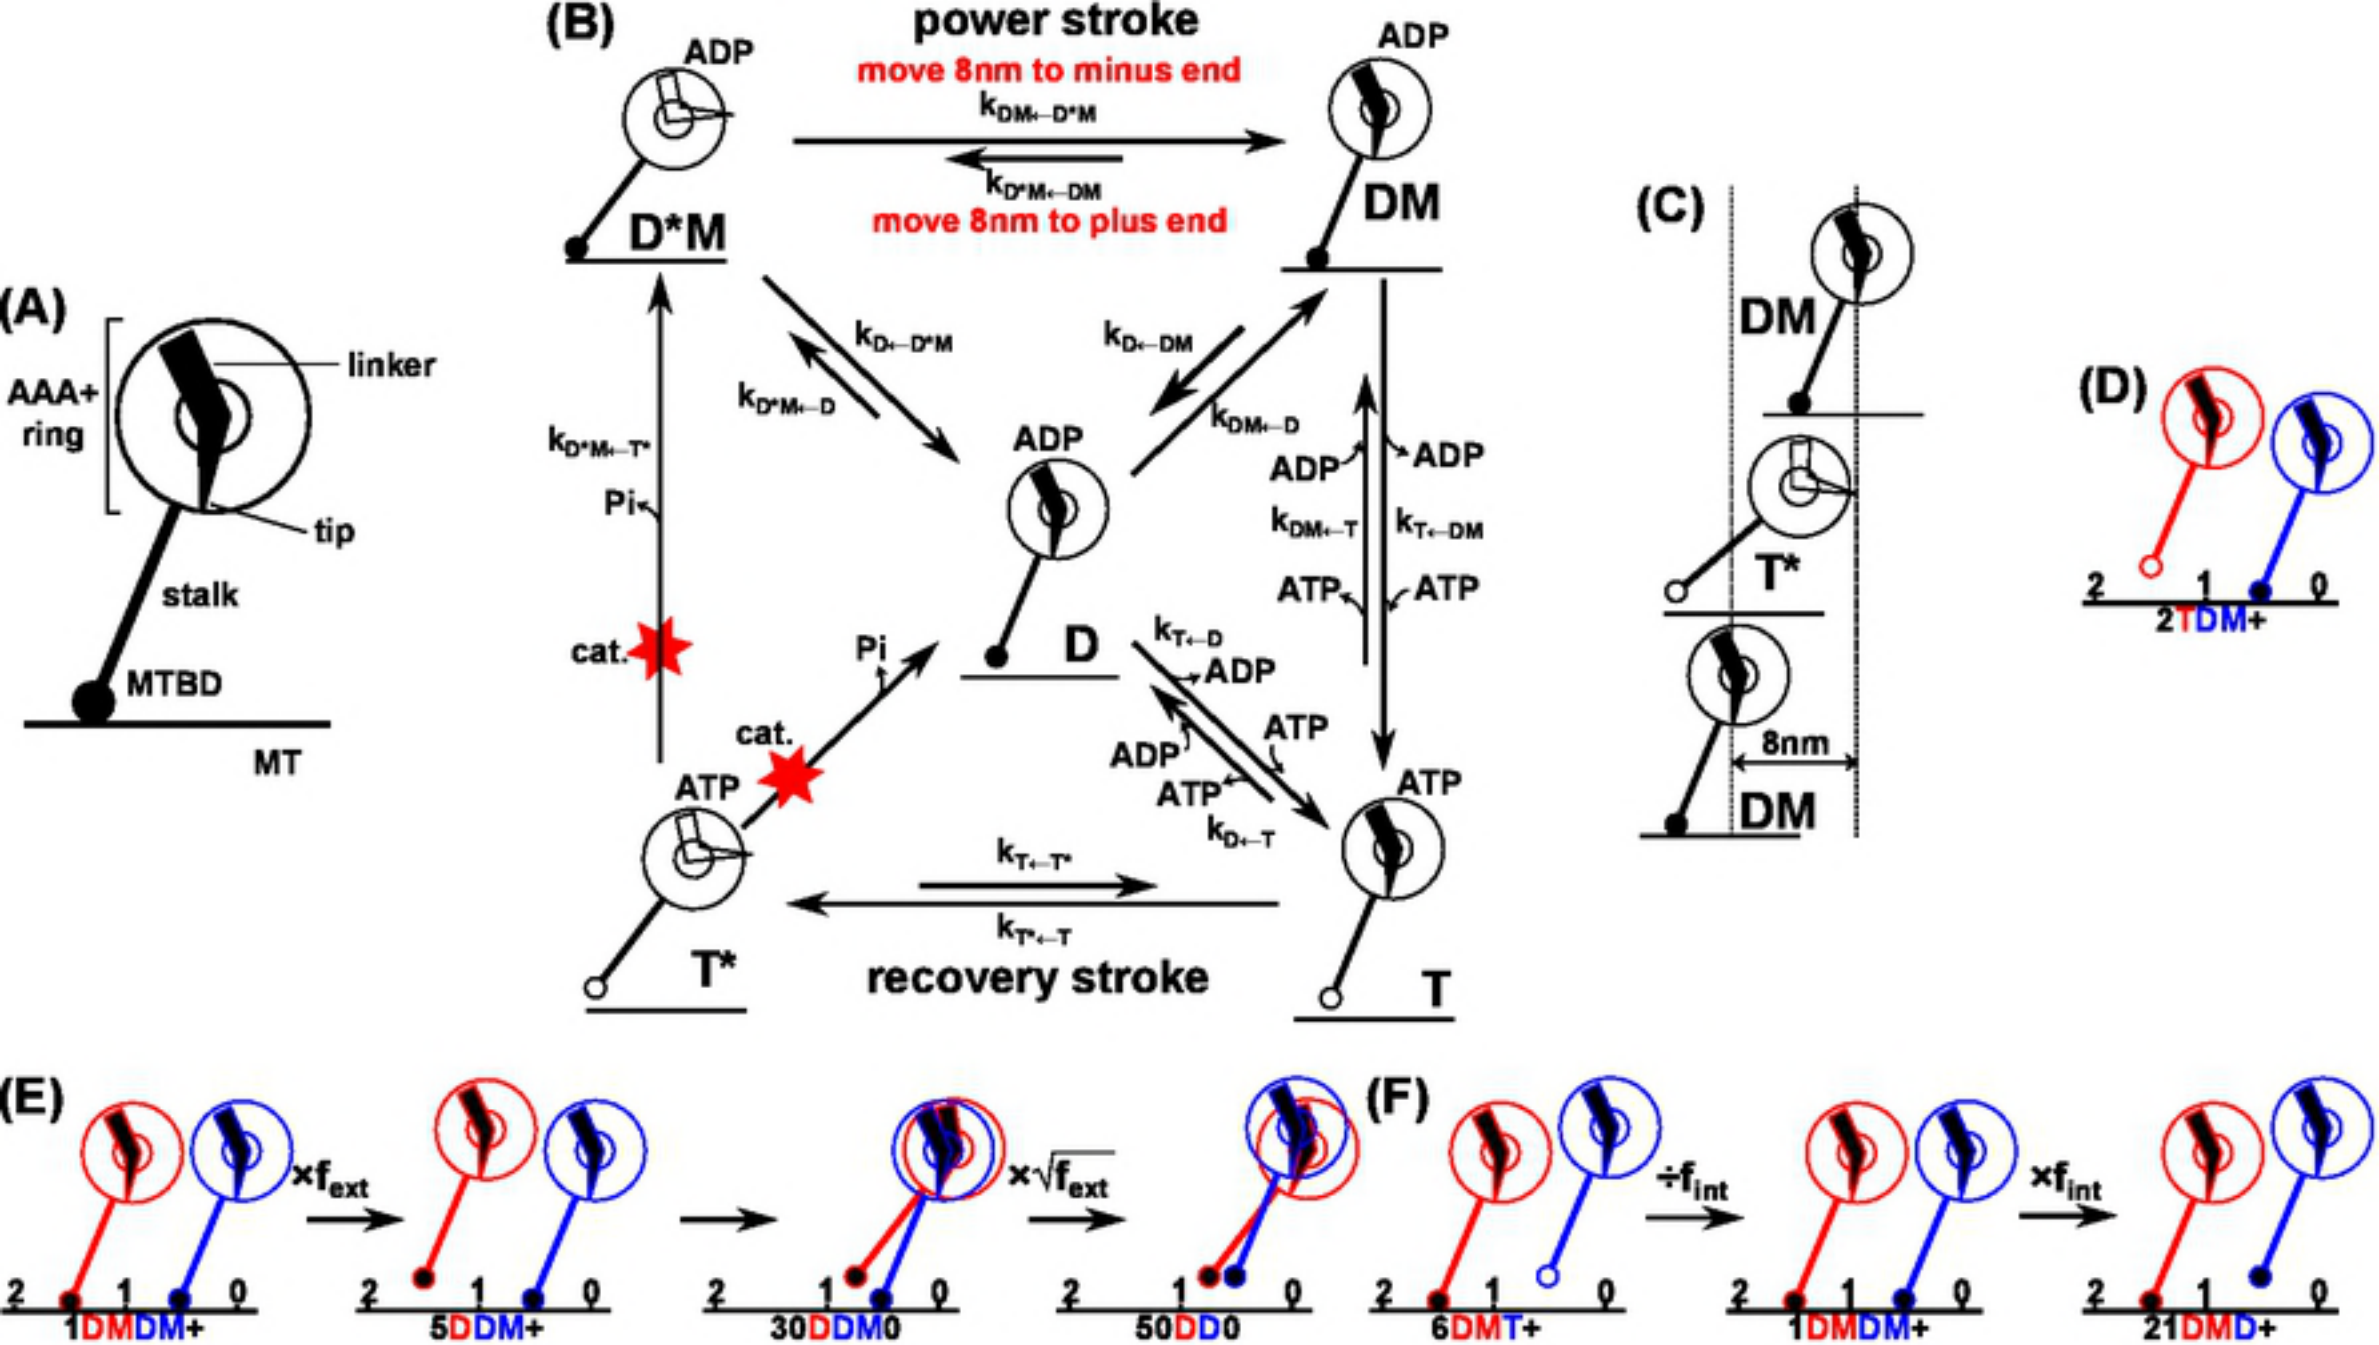

figure 1
